1 **Ring-finger protein 34 facilitates nervous necrosis**  
2 **virus evading antiviral innate immunity by targeting**  
3 **TBK1 and IRF3 for ubiquitination and degradation**

4

5 Wanwan Zhang,<sup>1,3,4,5</sup> Leshi Chen,<sup>1,3,4,5</sup> Lan Yao,<sup>1,3,4,5</sup> Peng Jia,<sup>1,2</sup> Yangxi Xiang,<sup>1,6</sup>

6 Meisheng Yi,<sup>1,3,4,5,\*</sup> Kuntong Jia<sup>1,3,4,5,\*</sup>

7

8 <sup>1</sup> School of Marine Sciences, Sun Yat-sen University, Guangzhou 510000, China;

9 <sup>2</sup> Fuzhou Medical University, Jiangxi, Fuzhou 344000, China;

10 <sup>3</sup> Guangdong Provincial Key Laboratory of Marine Resources and Coastal

11 Engineering, Guangzhou 510000, China;

12 <sup>4</sup> Pearl River Estuary Marine Ecosystem Research Station, Ministry of Education,

13 Zhuhai 519000, China

14 <sup>5</sup> Southern Marine Science and Engineering Guangdong Laboratory (Zhuhai), Zhuhai

15 519000, China.

16 <sup>6</sup> State Key Laboratory for Quality and Safety of Agro-products, Ningbo University,

17 Ningbo 315000, China.

18

19 \*Corresponding author

20 Email: yimsh@mail.sysu.edu.cn (Meisheng Yi);

21 Email: jiakt3@mail.sysu.edu.cn (Kuntong Jia)

## 22 **Abstract**

23 Ubiquitination, as one of the most prevalent posttranslational modifications of  
24 proteins, enables a tight control on host immune responses. Many viruses hijack the  
25 host ubiquitin system to regulate host antiviral responses for their survival. Here, we  
26 found that fish pathogen nervous necrosis virus (NNV) recruited an E3 ubiquitin ligase  
27 ring finger protein 34 (RNF34) to inhibit RLRs-mediated interferons (IFN) response  
28 via ubiquitinating TBK1 and IRF3. Ectopic expression of RNF34 greatly enhances  
29 NNV replication and prevents IFN production, while deficiency of RNF34 led to the  
30 opposite effect. Furthermore, RNF34 targets TBK1 and IRF3 via its RING domain. Of  
31 note, the interactions between RNF34 and TBK1 or IRF3 were conserved in different  
32 fish species. Mechanically, RNF34 promote K27-linked ubiquitination and degradation  
33 of TBK1 and IRF3, which in turn diminishing TBK1-induced translocation of IRF3  
34 from cytoplasm to nucleus. Ultimately, NNV capsid protein (CP) was found directly  
35 bind with RNF34 and this interaction was conserved in different fishes, and CP induced  
36 TBK1 and IRF3 degradation and IFN suppression was depended on RNF34. Our  
37 finding demonstrated a novel mechanism by which NNV CP evaded host innate  
38 immunity via RNF34, and provided a potential drug target for the control of NNV  
39 infection.

## 40 **Author Summary**

41 Ubiquitination plays an essential role in the regulation of innate immune responses  
42 to pathogens. NNV, a kind of RNA virus, is the causal agent of a highly destructive  
43 disease in a variety of marine and freshwater fish. Previous study reported NNV could

44 hijack the ubiquitin system to manipulate the host's immune responses, however, how  
45 NNV utilizes ubiquitination to facilitate its own replication is not well understood.  
46 Here, we identified a novel distinct role of E3 ubiquitin ligase RNF34 as an IFN  
47 antagonist to promote NNV infection. Nervous necrosis virus capsid protein utilized  
48 RNF34 to target TBK1 and IRF3 for K27 and K48-linked ubiquitination degradation.  
49 Importantly, the interactions between RNF34 and CP, TBK1 or IRF3 are conserved in  
50 different fishes, suggesting it is a general immune evasion strategy exploited by NNV  
51 to target the IFN response via RNF34.

## 52 **Introduction**

53 Ubiquitination is a protein modification occurring post-translationally that  
54 conjugating the 76-amino acid polypeptide ubiquitin to substrate proteins through  
55 lysine residues (K6, K11, K27, K29, K33, K48, and K63) [1]. A cascade of enzymes  
56 are responsible for ubiquitination, including ubiquitin-activating enzymes (E1),  
57 ubiquitin-conjugating enzymes (E2), and an ubiquitin ligases (E3), among which E3  
58 ubiquitin ligases are of particular interest due to their substrate specificity [2]. Based on  
59 the presence of specific functional domains and the mechanism of catalysis, E3  
60 ubiquitin ligases are divided into three major classes, including RING, RING-between-  
61 RING and HECT E3 ubiquitin ligase [3]. Numerous studies have demonstrated that E3  
62 ubiquitin ligases play important roles in a variety of biological and cellular processes,  
63 including but not limited to protein trafficking, apoptotic cell death, innate immune  
64 responses and virus infection. For example, E3 ubiquitin ligase deltex-4 (DTX4) is

65 recruited by NLRP4 and ubiquitinates TBK1 at K48-linked chains, thereby inhibiting  
66 interferon (IFN) signaling [4]. TRIM40 binds both MDA5 and RIG-I, and then  
67 promotes their polyubiquitination degradation through K27- and K48-linked chains,  
68 leading to a strong limitation on IFN production [5].

69 The innate immunity, as the first host defense line, would be initiated following  
70 the sense of viral infection. RIG-I-like receptors (RLRs), responsible for the recognition  
71 of RNA virus, evokes a downstream signaling cascade and then activates TANK-  
72 binding kinase 1 (TBK1) [6]. The activated TBK1 further motivates interferon  
73 regulatory factor 3 (IRF3) and promotes IRF3 translocation into the nucleus, which  
74 finally induces IFN and a series of interferon-stimulating genes (ISGs) production [7].  
75 To maintain host immune homeostasis, strict and precise immune system regulation is  
76 essential. Several studies have demonstrated that E3 ubiquitin ligases act as key  
77 regulators of the RLR-signaling pathway. For example, TBK1 undergoes  
78 posttranslational modifications including K63 or K48-linked polyubiquitination  
79 mediated by TNF receptor-associated factor 3 (TRAF3) or RNF128 for IFN signaling  
80 optimization during virus infection [8, 9]. RNF153 promotes the K48-linked  
81 ubiquitination degradation of mitochondrial antiviral signaling protein (MAVS)  
82 aggregates, suppressing MAVS-mediated IFN signaling [10].

83 Accumulating evidence shows that RING-type E3 ubiquitin ligases, the largest  
84 class of E3s, have been associated with the regulation of many aspects of the immune  
85 system [11]. For instance, RNF122 binds to RIG-I to induce K48-linked ubiquitination  
86 degradation of RIG-I, leading to the inhibition of type I IFN production [12]. RNF166

87 binds to TRAF3 and tumor necrosis factor (TNF)-associated factor 6 (TRAF6) and  
88 promotes the ubiquitination of TRAF3 and TRAF6 to enhance IFN- $\beta$  production [13].  
89 As a response to antiviral state in infected cells, many E3 ubiquitin ligases were  
90 hijacked by viruses to counteract the immune response [14]. For instance, hepatitis B e  
91 antigen suppressed the TRAF6-dependent K63-linked ubiquitination of NEMO,  
92 thereby downregulating nuclear factor kappa B (NF- $\kappa$ B) activity and promoting virus  
93 replication [15].

94 Nervous necrosis virus (NNV), belonging to the member of the genus  
95 *Betanodavirus* in *Nodaviridae* family, is a fish RNA virus that is prevalent worldwide  
96 and results in up to 100% mortality in affected larvae and juvenile fish [16]. NNV  
97 infection has caused considerable economic losses in aquaculture. NNV consists of two  
98 molecules of positive-sense single-stranded RNA (RNA1 and RNA2), which encodes  
99 RNA dependent RNA polymerase (RNA1) and capsid protein (CP, RNA2),  
100 respectively. Recently, we and other scholars reported that NNV could hijack the  
101 ubiquitin system to manipulate the host's immune responses. For example, NNV CP  
102 induced polyadenylate binding protein degradation to stimulate host translation shutoff  
103 by the ubiquitin-proteasome system [17]. We found that capsid protein of NNV targeted  
104 TRAF3 and IRF3 for ubiquitination and degradation, leading to the suppression of IFN  
105 production. Particularly, RNF114 was utilized by CP to promote ubiquitination and  
106 degradation of TRAF3 [18]. However, which E3 ubiquitin ligase is responsible for CP  
107 induced ubiquitination of IRF3 remains unknown.

108 In this study, we identified that RNF34 as the suppressor of RLRs-mediated type  
109 I IFNs production during NNV infection. RNF34 interacted with TBK1 and IRF3 and  
110 promoted their ubiquitination degradation. Furthermore, CP recruited RNF34 to evade  
111 host innate immunity. Our findings identified an evasion strategy employed by NNV to  
112 evade RLRs-mediated antiviral immune responses via recruitment of RNF34.

## 113 **Results**

### 114 **RNF34 facilitates RGNNV replication though inhibiting IFN** 115 **activation**

116 To explore the role of RNF34 during NNV infection, we investigated the effect of  
117 RNF34 on NNV replication. As shown in Fig 1A and B, ectopic expression of RNF34  
118 significantly increased CP expression, RNF34 knockdown resulted in a decreased  
119 transcription of NNV CP gene (Fig 1C and D). Furthermore, we found the transcription  
120 levels of IFN $\alpha$  and IFN-stimulated genes (ISGs), including ISG15, Viperin, and MX  
121 were significantly reduced by RNF34 (Fig 1E-H). Consistently, the result of luciferase  
122 reporter assays showed the IFN $\alpha$  promoter activity was significantly lower in RNF34  
123 overexpressing cells than that in control group (Fig 1I), indicating that RNF34 might  
124 promote RGNNV replication by inhibiting IFN antiviral response.

### 125 **RNF34 interacts with TBK1 and IRF3 and inhibits TBK1 and** 126 **IRF3-mediated IFN response**

127 The RLR-induced IFN response is essential for fish innate immunity against NNV  
128 infection [19], thus, we firstly investigated whether RNF34 is a negative interactor of

129 the key molecules in RLR signaling pathway. As shown in Fig 2A-D, RNF34 could be  
130 co-immunoprecipitated with both TBK1 and IRF3, but not with MAVS and TRAF3.  
131 Confocal microscopy analysis also showed both TBK1 and IRF3 were colocalized with  
132 RNF34 in the cytoplasm of HEK 293T cells (Fig 2E and F). Moreover, the interaction  
133 between RNF34 and TBK1 or IRF3 was also confirmed in another two model fish  
134 species, *Danio rerio* and *Oryzias melastigma* (Fig 2G and H). These data indicated that  
135 RNF34 universally interacted with TBK1 and IRF3.

136 To map the key domain that mediated the binding of RNF34 to TBK1 and IRF3,  
137 a series of truncated RNF34 mutants were constructed. As shown in Fig 2I and J, Co-  
138 IP assays showed that the deletion of RING domain of RNF34 completely abrogated  
139 the interaction between RNF34 and TBK1 or IRF3, suggesting that RING domain is  
140 essential for their interaction.

141 To elucidate the effect of RNF34 on IFN response induced by TBK1 and IRF3,  
142 the luciferase reporter assay was conducted. As shown in Fig 3A and B, RNF34 had a  
143 dose-dependent inhibitory effect on the activation of the IFN $\beta$  promoter mediated by  
144 TBK1 and IRF3. A domain mapping experiment further found that deletion of RING  
145 domain, but not the Zinc domain, lost the ability to suppress TBK1 and IRF3-induced  
146 IFN $\beta$  promoter (Fig 3C and D). These data indicated that RNF34 negatively regulated  
147 RLR-induced host IFN response by targeting TBK1 and IRF3.

148 **RNF34 mediates K27- and K48-linked ubiquitination and**  
149 **degradation of TBK1 and IRF3**

150 To elucidate the underlying mechanism of RNF34 on negative regulation of TBK1  
151 and IRF3-mediated IFN response, the effect of RNF34 on TBK1 and IRF3 expression  
152 was investigated. RNF34 overexpression inhibited mRNA expression of both TBK1  
153 and IRF3, whereas RNF34 knockdown led to the opposite effects (Fig 4A and B).  
154 Meanwhile, RNF34 decreased TBK1 or IRF3 protein levels in a dose-dependent  
155 manner in HEK 293T cells (Fig 4C and D). Consistently, RNF34 also reduced the  
156 protein expression levels of endogenous TBK1 and IRF3 in LJB cells without or with  
157 RGNNV challenge (Fig 4E and F). Furthermore, MG132 (a proteasome inhibitor) or  
158 NH<sub>4</sub>Cl (a lysosome inhibitor) was used to determine whether the proteasome or  
159 lysosome pathway was responsible for RNF34-induced TBK1 and IRF3 degradation.  
160 As shown in Fig 5A and B, MG132 restored RNF34 induced TBK1 and IRF3  
161 degradation, but NH<sub>4</sub>Cl could not block the decrease of TBK1 and IRF3 caused by  
162 RNF34 (S1 Fig), indicating that TBK1 and IRF3 undergoes RNF34-mediated  
163 proteasomal degradation. Moreover, we found that RNF34 induced the K27- and K48-  
164 linked ubiquitination and degradation of TBK1 and IRF3 (Fig 5C and D). Consistently,  
165 luciferase assay results indicated that the inhibition effect of RNF34 on TBK1 and  
166 IRF3-induced IFN $\beta$  reporter activation was enhanced by ubiquitin-K27 and ubiquitin-  
167 K48 (Fig 5E and F).

### 168 **RNF34 impairs TBK1-induced nuclear translocation of IRF3**

169 Upon TBK1 activation, it would promote IRF3 translocating into the nucleus to  
170 activate the innate immunity and IFN production [20]. Thus, we further detected  
171 whether TBK1-induced IRF3 translocation was influenced by RNF34. As expected,



172 when HEK 293T cells were transfected with TBK1 and IRF3, the cytoplasmic-localized  
173 IRF3 was observed in the nucleus; when the cells were further transfected with RNF34,  
174 IRF3 was predominantly found in cytoplasm, colocalized with the cytoplasmic RNF34  
175 and TBK1 (Fig 6A). Consistent with the above observation, the Western blot analysis  
176 of cytoplasmic and nuclear fractions proved this finding, as TBK1 overexpression-  
177 induced the increasement of nuclear IRF3 protein was attenuated by RNF34 (Fig 6B).

### 178 **CP recruits RNF34 to inhibit TBK1 and IRF3 induced IFN** 179 **response.**

180 Our previous study has shown that CP can regulate protein ubiquitination to  
181 suppress RLR-mediated type-I IFN signaling [21]. Thus, we further examined the  
182 relationship between RNF34 and CP. Confocal microscopy and Co-IP assays revealed  
183 that RNF34 was associated with CP (Fig 7A-C). Pull-down assays showed a direct  
184 interaction between RNF34 and CP (Fig 7D). As shown in Fig 7E, the interaction  
185 relationship between RNF34 and CP was also confirmed in *Danio rerio* and *Oryzias*  
186 *melastigma*. In addition, we found that RNF34 was coprecipitated with CP wild-type,  
187 ARM domain deletion mutant, S domain deletion mutant, LR domain deletion mutant  
188 and P domain deletion mutant, but not with the arm domain deletion mutant (Fig 7F).

189 We further investigated the effect of CP on TBK1. CP induced the degradation of  
190 TBK1 in a dose dependent manner under endogenous and overexpressed conditions,  
191 and this effect could be recovered by MG132 treatment (Fig 8A-C), suggesting CP  
192 promoted the degradation of TBK1 through ubiquitination. Given the interaction  
193 between RNF34 and CP, we speculated that RNF34 might be involved in CP-induced

194 TBK1 and IRF3 degradation. To test this hypothesis, we detected TBK1 and IRF3  
195 expression in LJB cells cotransfected with CP plasmids and NC or siRNF34. The results  
196 showed that the inhibition of CP on TBK1 and IRF3 expression was decreased in the  
197 presence of siRNF34 in a dose-dependent manner, which would be further counteracted  
198 by RNF34 ectopic expression (Fig 8D). Consistently, luciferase reporter assays showed  
199 that siRNF34 attenuated CP-reduced IFN $\beta$  promoter activity (Fig 8E). Taken together,  
200 these results demonstrated that CP utilized RNF34 to reduce IFN production via  
201 promoting TBK1 and IRF3 ubiquitination and degradation.

## 202 **Discussion**

203 To survive in hosts, viruses have evolved various strategies to evade host antiviral  
204 innate immunity for their replication. As a pivotal sensor of RNA viruses and activator  
205 of IFN production, RLRs-mediated signaling is tightly regulated by host and viral  
206 factors [22]. Here, we identified that NNV evaded RLRs-mediated IFN response via  
207 the host E3 ubiquitin ligases RNF34. Mechanistically, NNV CP blocked the RLRs  
208 signaling pathway by binding with RNF34 for ubiquitination degradation of TBK1 and  
209 IRF3 (Fig 9). RNF34, a caspase 8/10-associated ubiquitin ligase, was firstly identified  
210 as a RING-type E3 ubiquitin ligase in human [23]. Emerging evidence has shown that  
211 RNF34 is involved in many biological processes, such as the development of multiple  
212 neurological disease, brown fat cell metabolism and immune response [24]. For  
213 example, RNF34 inhibited activation of NF- $\kappa$ B through direct interaction and  
214 ubiquitination of NOD1 [25]. A recent study showed that RNF34 negatively regulated

215 RLRs-mediated antiviral immunity responses by promoting autophagic degradation of  
216 MAVS [26]. Hence, our finding demonstrates a novel distinct mechanism of RNF34  
217 functioning as an IFN antagonist via targeting TBK1 and IRF3 for ubiquitination and  
218 degradation, which highlights the importance of RNF34 in regulation of RLRs-  
219 mediated signaling pathway.

220 Ubiquitination is an essential posttranslational modification that plays crucial roles  
221 in the control of antiviral immunity upon virus infection. As crucial components of the  
222 ubiquitination system, an increasing number of RING-domain E3 ligases have emerged  
223 as key regulators of immune responses. For instance, RNF122 promoted RIG-I  
224 degradation via K48-linked ubiquitination to inhibit host immunity against virus  
225 infection [12]. RNF19a catalyzed K48-linked ubiquitination to degrade RIG-I, and  
226 finally attenuated RIG-I-mediated immune responses [27]. Here, we found that RNF34  
227 functions as a negative regulator of RLRs-mediated signaling pathway to facilitate  
228 NNV replication via targeting TBK1 and IRF3. Importantly, the interaction between  
229 RNF34 and TBK1 or IRF3 was conserved in different fishes, indicating the  
230 conservation of RNF34' function. The RING domain is the critical functional domain  
231 for RING finger family E3 ubiquitin ligases. Truncation mutation within RING domain  
232 abolished the ability of Mex3A to induce the ubiquitination and degradation of RIG-I  
233 [28]. TRIM40 mutant lacking RING domain greatly impaired its inhibition on IFN- $\beta$   
234 promoter activity [5]. In this study, we found that RNF34 interacted with TBK1 and  
235 IRF3 via its RING domain, and the RING domain is indispensable for the ability of

236 RNF34 to restrain IFN signaling, indicating that the E3 ligase activity of RNF34 is  
237 essential for its regulatory function on TBK1 and IRF3.

238 TBK1 and IRF3 are important adaptors of the RLRs-mediated signaling pathway,  
239 therefore, both are tightly regulated by a variety of mechanisms such as ubiquitination,  
240 phosphorylation, prevention of active TBK1 complexes formation, and blocking of the  
241 IRF3 translocation from cytoplasm into the nucleus [27]. Recently, emerging evidence  
242 has shown the regulation of TBK1-IRF3 activity via the ubiquitin system. For example,  
243 multiple E3 ubiquitin ligases, such as Triad3A [29], TRIM27 [30] and DXT4 [4] target  
244 TBK1 for K48-linked polyubiquitination degradation, thus negatively regulating type I  
245 IFN production. TRIM26 [31], RAUL [32], and RBCC protein interacting with PKC  
246 [33], conjugate K48-linked polyubiquitin chains on IRF3, resulting in proteasomal  
247 degradation of IRF3 and inhibition of host antiviral innate immune response. Here,  
248 RNF34 was found to mediated K27 and K48-linked polyubiquitination of both TBK1  
249 and IRF3, thus inhibit IFN signaling. In addition, we also found that RNF34 not only  
250 led to the degradation of IRF3, but the inhibition of TBK1-induced IRF3 nuclear  
251 translocation. Considering the importance of IRF3 nuclear translocation for the  
252 activation of the IFN-I promoter, we speculated that RNF34 interfered with TBK1-  
253 induced IRF3 nuclear translocation by degrading TBK1, subsequently dampened type  
254 I IFN response. To the best of our known, only MAVS had been identified as a target  
255 of RNF34 negatively regulating RLRs-mediated antiviral immunity. Hence, our study  
256 provides novel target molecules of RNF34 in RLRs-mediated signaling pathway.

257           Given the important role of ubiquitination in the innate immune response, many  
258 viruses have evolved elaborate mechanisms to directly or indirectly hijack the host  
259 ubiquitin system to favor self-replication. For instance, the V protein of Newcastle  
260 disease virus inhibited IFN signaling by promoting ubiquitination-dependent  
261 degradation of MAVS via RNF5 [34]. African swine fever virus pI215L protein  
262 recruited RNF138 to reduce K63-linked ubiquitination of TBK1, resulting in the  
263 inhibition of IFN production [35]. The NNV CP is responsible for host innate immune  
264 evasion, however its exact evasion mechanisms are not well characterized. We and  
265 others have previously shown that the ubiquitin proteasome system played an important  
266 role during NNV infection [17, 36]. Recently, we found NNV CP targeted sea perch  
267 TRAF3 and IRF3 to promote their ubiquitination degradation, leading to the inhibition  
268 of IFN response. Of note, RNF114 was exploited by CP through its P domain to  
269 potentiates K27- and K48-linked ubiquitination of TRAF3 [21, 36]. However, the E3  
270 ubiquitin ligase participated in CP-induced IRF3 ubiquitination degradation was still  
271 unknown. Here, we found that CP upregulated the expression of RNF34 and directly  
272 interacted with RNF34, indicating that RNF34 might be associated with CP induced  
273 IRF3 degradation. Importantly, their interaction is conservative in different fishes. CP  
274 consists of four domains and a linker region (L) [37]: the N-terminal ARM (ARM),  
275 which contains a nucleolus localization signal (aa 23 to 31) associating with cell cycle  
276 arrest; N-terminal arm (arm), a conserved region that recruits the RNA during  
277 encapsidation; the shell domain (S), which is responsible for virus assembly, and the  
278 protrusion domain (P) that is involved in interacting with the host cell surface and the

279 trimerization of the protein [16]. Interestingly, the diverse CP domains had been found  
280 responsible for different conjugated protein localization, such as NNV receptor HSC70  
281 bind on ARM domain; HSP90ab1 target on L domain [38]; the CP S domain is  
282 contributed to interactions with both of IRF3 and TRAF3 [21]. Here, different with  
283 them, domain mapping showed RNF34 bind to the arm domain of CP, implying a novel  
284 molecular function of CP arm domain.

285 Furthermore, our data demonstrated that NNV CP could induce TBK1  
286 degradation, which can be recovered by MG132 treatment and deficiency of RNF34,  
287 suggesting that RNF34 was responsible for CP-mediated TBK1 degradation.  
288 Meanwhile, deficiency of RNF34 also impaired CP-mediated IRF3 degradation. All  
289 these results demonstrated that CP recruited RNF34 to mediate TBK1 and IRF3  
290 ubiquitination and degradation. Previously, we had reported that CP hijacked RNF114  
291 to catalyze the K27- and K48-linked ubiquitination of TRAF3 for proteasomal  
292 degradation, decreasing TRAF3-mediated IFN signaling [21]. The findings identified a  
293 novel strategy adopted by NNV to evade host antiviral innate immunity via hijacking  
294 the RNF proteins-mediated ubiquitination process and suggested that CP could utilize  
295 multiple E3 ubiquitin ligases to suppress the RLRs-mediated antiviral signaling.  
296 Considering the interactions of CP and RNF34, RNF34 and TBK1 or IRF3 are  
297 conserved in different fishes, we speculate that it is a general immune evasion strategy  
298 exploited by CP to target against the IFN response via RNF34.

299 Overall, we have identified RNF34 as a suppressor of host innate immune  
300 response to promote NNV infection. Furthermore, NNV CP hijacks RNF34 to induce  
301 the ubiquitination and degradation of TBK1 and IRF3 for inhibition of IFN signaling.  
302 These findings reveal a new mechanism used by CP to counteract the IFN responses

303 for supporting viral proliferation and provide a new understanding of the immune  
304 evasion strategies used by NNV.

## 305 **Materials and Methods**

### 306 **Cell culture and reagents.**

307 LJB cells derived from sea perch (*Lateolabrax japonicus*) brain were cultured in  
308 DMEM medium (Gibco) with 15% FBS at 28°C [39]. Fathead minnow (FHM) cells  
309 were cultured in M199 medium (Gibco) with 10% FBS at 28°C. Human embryonic  
310 kidney 293T (HEK 293T) cells were maintained in DMEM/F12 with 10% FBS at 37°C  
311 in 5% CO<sub>2</sub> hatchery.

312 Antibodies to Flag tag (M20008L), Myc tag (M20002L), His tag (M20001L), HA  
313 tag (M20003L) and actin (P30002L) were obtained from Abmart (Guangzhou, China).  
314 Antibodies to TBK1 (bs-7497R) and IRF3 (bs-1185R) were obtained from Bioss  
315 (Beijing, China). Anti-Lamin B1 antibodies (CPA1693) were purchased from Cohesion  
316 Biosciences (Shanghai, China). Donkey anti-mouse or goat anti-rabbit IgG (H + L)  
317 highly cross-adsorbed secondary antibodies, Alexa Fluor™ 555 and Alexa Fluor™ 488  
318 were obtained from Invitrogen (Carlsbad, CA, USA). Magnetic beads of anti-Flag (HY-  
319 K0207), anti-c-Myc (HY-K0206) and anti-His (HY-K0209) were purchased from  
320 MedChemExpress (Monmouth Junction, NJ, USA). MG132 (M7449), NH<sub>4</sub>Cl (A9434),  
321 DAPI (D9542), phenylmethylsulfonyl fluoride (P7626), and isopropyl-1-thio-β-D-  
322 galactopyranoside (IPTG) (I6758) were procured from Sigma-Aldrich (St. Louis, MO).

### 323 **Plasmids construction.**

324 The full-length sequences of sea perch *RNF34* (GenBank accession number:  
325 OP784387) was amplified by PCR using primers (S1 Table) and was subsequently  
326 cloned into *pCMV-Flag/Myc* vector (Clontech). RNF34 deletion mutants  
327 (*RNF34 $\Delta$ RING* and *RNF34 $\Delta$ Zinc*) were constructed by PCR and subcloned into  
328 *pCMV-Flag* vector. RNF34 from zebrafish (*Danio rerio*) and marine medaka (*Oryzias*  
329 *melastigma*) were cloned into *pCMV-Flag* vector, respectively. *Flag-MAVS*, *Flag-*  
330 *TRAF3*, *Flag-IRF3*, *Flag-TBK1*, *Myc-IRF3*, *Myc-TBK1*, *pGL3-IFN $\alpha$ -pro-Luc*, *pRL-TK*,  
331 *HA-K27*, *HA-K48*, *HA-K63*, *Flag-CP*, *pET32a(+)-CP* and truncated mutants of CP  
332 with Flag tags were obtained as described previously [21].

### 333 **Cell transfection and NNV infection.**

334 LJB cells in six-well plates ( $1 \times 10^6$  cells/well) were transfected with different  
335 plasmids using Lipofectamine 8000 (Beyotime, Shanghai, China) following the  
336 manufacturer's instructions. Post 24 h transfection, the cells were infected with red-  
337 spotted grouper NNV (RGNNV) at a multiplicity of infection (MOI) of 1 for the  
338 indicated hours and examined by quantitative reverse transcription-PCR (qRT-PCR) or  
339 Western blot.

### 340 **Cells stimulation.**

341 For stimulation, the cells in six-well plates were treated with proteasomal inhibitor  
342 MG132 (20 or 50 mM), lysosomal inhibitor  $\text{NH}_4\text{Cl}$  (20 or 50 mM) or DMSO for 6 h,  
343 respectively. Post 24 h transfection, the cells were subjected to Western blot analysis.

### 344 **RNA interference**



345 Small interfering RNAs (siRNAs) targeting RNF34 (siRNF34) were synthesized  
346 by the Ribobio company (Guangzhou, China), including siRNA-1: 5'-  
347 CACCGATACCTGCAGGGA-3'; siRNA-2: 5'-GAGGAAGAGGAGGACCC-3';  
348 siRNA-3: 5'-AAGAACAGGAAATCATT-3'; and control siRNA (NC): 5'-  
349 UUCUCCGAACGUGUCACGUTT-3'. Cells were transfected with the indicated  
350 siRNA as described previously [40].

### 351 **qRT-PCR.**

352 Total RNA of cultured cells was extracted with TRIzol reagent (Invitrogen, CA,  
353 USA) according to the manufacturer's instructions and was further reverse-transcribed  
354 into cDNA through the PrimeScript™ RT Reagent Kit with gDNA Eraser (TaKaRa).  
355 A LightCycler 480 II (Roche Applied Science, Germany) and SYBR RT-PCR kit  
356 (Roche) were used for qRT-PCR analysis by using gene-specific primers (S1 Table).  
357 mRNA relative expressions were evaluated from triplicate experiments and normalized  
358 to sea perch *β-actin*. The relative fold induction of genes was calculated using the  $2^{-\Delta\Delta Ct}$   
359 method and presented as mean  $\pm$  S.D.

### 360 **Western blot and Co-immunoprecipitation (Co-IP).**

361 The cells were lysed with lysates buffer (Beyotime), and boiled 10 min with 1%  
362 SDS for SDS-PAGE separation. The proteins were transferred onto PVDF membranes  
363 (Millipore, USA), then blocked with 5 % non-fat dried milk for 1 h at room temperature  
364 (RT), followed by primary antibodies incubation at 4 °C overnight, including anti-Flag  
365 (1:4000), anti-Myc (1:4000), anti-HA (1:4000), anti-TBK1 (1:1000), anti-IRF3  
366 (1:1000), anti-actin (1:2000) or anti-Lamin B1 (1:1000) antibodies. The membranes

367 were further probed with donkey anti-mouse or goat anti-rabbit IgG (H + L) highly  
368 cross-adsorbed secondary antibodies (1:1000) for 1 h at RT, and analyzed using ECL  
369 immunoblotting detection reagents (Millipore, USA) on a chemiluminescence  
370 instrument (Sage Creation, China).

371 For Co-IP assay, cell extracts were incubated with anti-Flag/Myc magnetic beads  
372 at 4 °C overnight. The beads were washed five times with lysis buffer and eluted with  
373 1% SDS buffer for boiling and Western blot.

### 374 **Pull-down**

375 Pull-down assays were performed as described previously [38]. His-fused CP  
376 proteins were extracted from *pET-32a (+)-CP* plasmids-transformed *E. coli*  
377 *BL21(DE3)* cells with 0.5 mM IPTG stimulation. His-Tag magnetic beads were firstly  
378 mixed with the His-fused CP proteins for 4 h at RT. Then the beads were incubated  
379 with protein lysates from HEK 293T cells post *pCMV-Myc-RNF34* transfection at 4 °C  
380 overnight, and finally analyzed by Western blot.

### 381 **Immunofluorescence assays.**

382 HEK 293T cells plated on coverslips in 24-well plates were transfected with  
383 different plasmids. After 24 h transfection, cells were washed twice with PBS and fixed  
384 with 4% paraformaldehyde for 1 h. After permeabilization with 0.15% Triton X-100  
385 for 10 min and blocking with 5% skim milk for 1 h, the cells were incubated with  
386 primary antibodies at 4 °C overnight, including anti-Flag (1:500) and anti-Myc (1:500)  
387 antibodies, and followed by incubation with Alexa Fluor™ 555 or 488 conjugated  
388 secondary antibodies against mouse IgG (1:1000). The coverslips were washed with

389 PBS and observed under a SP8 Leica laser confocal microscopy imaging system (Leica,  
390 Germany).

### 391 **Luciferase reporter assays.**

392 FHM cells in 24-well plates were transfected with the sea perch IFN $\alpha$  promoter  
393 luciferase reporter plasmid (*pGL3-IFN $\alpha$ -pro-Luc*) and indicated plasmids. A renilla  
394 luciferase plasmid (*pRL-TK*) was co-transfected as an internal control. After 24 h  
395 transfection, the cells were lysed, the luciferase activity in cells was analyzed using a  
396 GloMax 20/20 luminometer with the Dual-Luciferase Reporter Assay system  
397 (Promega).

### 398 **Statistical analysis.**

399 Data are collected from three independent experiments, analyzed through SPSS  
400 version 20.0, and presented as the means  $\pm$  S.D. Student's t-test or one-way ANOVA  
401 was used for the statistical comparisons between two-group or multiple group  
402 comparisons, respectively.  $p < 0.05$  was considered with statistically significant  
403 difference;  $p < 0.01$  was considered with highly significant difference.

## 404 **References**

- 405 1. Gao P, Ma X, Yuan M, Yi Y, Liu G, Wen M, et al. E3 ligase Nedd4l promotes  
406 antiviral innate immunity by catalyzing K29-linked cysteine ubiquitination of  
407 TRAF3. *Nat Commun.* 2021;12(1):1194.
- 408 2. Pickart CM. Mechanisms underlying ubiquitination. *Annu Rev Biochem.*  
409 2001;70:503-533.
- 410 3. Zheng N, Shabek N. Ubiquitin ligases: Structure, function, and regulation. *Annu*  
411 *Rev Biochem.* 2017;86:129-157.
- 412 4. Cui J, Li Y, Zhu L, Liu D, Songyang Z, Wang HY, et al. NLRP4 negatively  
413 regulates type I interferon signaling by targeting the kinase TBK1 for degradation  
414 via the ubiquitin ligase DTX4. *Nat Immunol.* 2012;13(4):387-395.

- 
- 415 5. Zhao C, Jia M, Song H, Yu Z, Wang W, Li Q, et al. The E3 Ubiquitin ligase  
416 TRIM40 attenuates antiviral immune responses by targeting MDA5 and RIG-I.  
417 Cell Rep. 2017;21(6):1613-1623.
  - 418 6. Dixit E, Kagan JC. Intracellular pathogen detection by RIG-I-like receptors. Adv  
419 Immunol. 2013;117:99-125.
  - 420 7. Hopfner KP, Hornung V. Molecular mechanisms and cellular functions of cGAS-  
421 STING signalling. Nat Rev Mol Cell Biol. 2020;21(9):501-521.
  - 422 8. Song G, Liu B, Li Z, Wu H, Wang P, Zhao K, et al. E3 ubiquitin ligase RNF128  
423 promotes innate antiviral immunity through K63-linked ubiquitination of TBK1.  
424 Nat Immunol. 2016;17(12):1342-1351.
  - 425 9. Zhang M, Wang L, Zhao X, Zhao K, Meng H, Zhao W, et al. TRAF-interacting  
426 protein (TRIP) negatively regulates IFN- $\beta$  production and antiviral response by  
427 promoting proteasomal degradation of TANK-binding kinase 1. J Exp Med.  
428 2012;209(10):1703-1711.
  - 429 10. Yoo YS, Park YY, Kim JH, Cho H, Kim SH, Lee HS, et al. The mitochondrial  
430 ubiquitin ligase MARCH5 resolves MAVS aggregates during antiviral signalling.  
431 Nat Commun. 2015;6:7910.
  - 432 11. Liu YC. Ubiquitin ligases and the immune response. Annu Rev Immunol.  
433 2004;22:81-127.
  - 434 12. Wang W, Jiang M, Liu S, Zhang S, Liu W, Ma Y, et al. RNF122 suppresses  
435 antiviral type I interferon production by targeting RIG-I CARDs to mediate RIG-  
436 I degradation. Proc Natl Acad Sci U S A. 2016;113(34):9581-9586.
  - 437 13. Chen HW, Yang YK, Xu H, Yang WW, Zhai ZH, Chen DY. Ring finger protein  
438 166 potentiates RNA virus-induced interferon-beta production via enhancing the  
439 ubiquitination of TRAF3 and TRAF6. Sci Rep. 2015;5:14770.
  - 440 14. Viswanathan K, Fruh K, DeFilippis V. Viral hijacking of the host ubiquitin system  
441 to evade interferon responses. Curr Opin Microbiol. 2010;13(4):517-523.
  - 442 15. Wang Y, Cui L, Yang G, Zhan J, Guo L, Chen Y, et al. Hepatitis B e antigen  
443 inhibits NF-kappaB activity by interrupting K63-linked ubiquitination of NEMO.  
444 J Virol. 2019;93(2):e00667-00618.
  - 445 16. Bandin I, Souto S. Betanodavirus and VER disease: A 30-year research review.  
446 Pathogens. 2020;9(2):106-152.
  - 447 17. Cheng CA, Luo JM, Chiang MH, Fang KY, Li CH, Chen CW, et al. Nervous  
448 necrosis virus coat protein mediates host translation shutoff through nuclear  
449 translocation and degradation of polyadenylate binding protein. J Virol.  
450 2021;95(17):e0236420.
  - 451 18. Zhang W, Jia P, Lu X, Chen X, Weng J, Jia K, et al. Capsid protein from red-  
452 spotted grouper nervous necrosis virus induces incomplete autophagy by  
453 inactivating the HSP90ab1-AKT-MTOR pathway. Zool Res. 2022;43(1):98-110.
  - 454 19. Zhang W, Li Z, Jia P, Liu W, Yi M, Jia K. Interferon regulatory factor 3 from sea  
455 perch (*Lateolabrax japonicus*) exerts antiviral function against nervous necrosis  
456 virus infection. Dev Comp Immunol. 2018;88:200-205.
  - 457 20. Kawai T, Akira S. Innate immune recognition of viral infection. Nat Immunol.  
458 2006;7(2):131-137.

- 
- 459 21. Jia P, Zhang W, Xiang Y, Lu X, Chen X, Pan H, et al. The capsid protein of  
460 nervous necrosis virus antagonizes host type I IFN production by a dual strategy  
461 to negatively regulate retinoic acid-inducible gene-I-like receptor pathways. *J*  
462 *Immunol.* 2022;209(2):326-336.
- 463 22. Onomoto K, Onoguchi K, Yoneyama M. Regulation of RIG-I-like receptor-  
464 mediated signaling: interaction between host and viral factors. *Cell Mol Immunol.*  
465 2021;18(3):539-555.
- 466 23. Wei P, Pan D, Mao C, Wang YX. RNF34 is a cold-regulated E3 ubiquitin ligase  
467 for PGC-1 $\alpha$  and modulates brown fat cell metabolism. *Mol Cell Biol.*  
468 2012;32(2):266-275.
- 469 24. Fang S, Cheng Y, Deng F, Zhang B. RNF34 ablation promotes cerebrovascular  
470 remodeling and hypertension by increasing NADPH-derived ROS generation.  
471 *Neurobiol Dis.* 2021;156:105396.
- 472 25. Zhang R, Zhao J, Song Y, Wang X, Wang L, Xu J, et al. The E3 ligase RNF34 is  
473 a novel negative regulator of the NOD1 pathway. *Cell Physiol Biochem.*  
474 2014;33(6):1954-1962.
- 475 26. He X, Zhu Y, Zhang Y, Geng Y, Gong J, Geng J, et al. RNF34 functions in  
476 immunity and selective mitophagy by targeting MAVS for autophagic  
477 degradation. *EMBO J.* 2019;38(14):e100978.
- 478 27. Yang Y, Cao X, Huang L, Yang A. RNF19a inhibits antiviral immune response to  
479 RNA viruses through degradation of TBK1. *Mol Immunol.* 2022;143:1-6.
- 480 28. Jiang Z, Sun Z, Hu J, Li D, Xu X, Li M, et al. Grass carp Mex3A promotes  
481 ubiquitination and degradation of RIG-I to inhibit innate immune response. *Front*  
482 *Immunol.* 2022;13:909315.
- 483 29. Nakhaei P, Mesplede T, Solis M, Sun Q, Zhao T, Yang L, et al. The E3 ubiquitin  
484 ligase Triad3A negatively regulates the RIG-I/MAVS signaling pathway by  
485 targeting TRAF3 for degradation. *PLoS Pathog.* 2009;5(11):e1000650.
- 486 30. Zheng Q, Hou J, Zhou Y, Yang Y, Xie B, Cao X. Siglec1 suppresses antiviral  
487 innate immune response by inducing TBK1 degradation via the ubiquitin ligase  
488 TRIM27. *Cell Res.* 2015;25(10):1121-1136.
- 489 31. Wang P, Zhao W, Zhao K, Zhang L, Gao C. TRIM26 negatively regulates  
490 interferon- $\beta$  production and antiviral response through polyubiquitination and  
491 degradation of nuclear IRF3. *PLoS Pathog.* 2015;11(3):e1004726.
- 492 32. Yu Y, Hayward GS. The ubiquitin E3 ligase RAUL negatively regulates type I  
493 Interferon through ubiquitination of the transcription factors IRF7 and IRF3.  
494 *Immunity.* 2010;33(6):863-877.
- 495 33. Zhang M, Tian Y, Wang RP, Gao D, Zhang Y, Diao FC, et al. Negative feedback  
496 regulation of cellular antiviral signaling by RBCK1-mediated degradation of  
497 IRF3. *Cell Res.* 2008;18(11):1096-1104.
- 498 34. Sun Y, Zheng H, Yu S, Ding Y, Wu W, Mao X, et al. Newcastle disease virus V  
499 protein degrades mitochondrial antiviral signaling protein to inhibit host type I  
500 interferon production via E3 ubiquitin ligase RNF5. *J Virol.* 2019;93(18):e00322-  
501 00319.

- 502 35. Li L, Fu J, Li J, Guo S, Chen Q, Zhang Y, et al. African swine fever virus pI215L  
503 inhibits type I interferon signaling by targeting interferon regulatory factor 9 for  
504 autophagic degradation. *J Virol.* 2022;96(17):e0094422.
- 505 36. Xiang Y, Zhang W, Jia P, Lu X, Liu W, Yi M, et al. E3 ubiquitin ligase RNF114  
506 inhibits innate immune response to red-spotted grouper nervous necrosis virus  
507 infection in sea perch by targeting MAVS and TRAF3 to mediate their  
508 degradation. *J Immunol.* 2021;206(1):77-88.
- 509 37. Chen NC, Yoshimura M, Guan HH, Wang TY, Misumi Y, Lin CC, et al. Crystal  
510 structures of a piscine betanodavirus: Mechanisms of capsid assembly and viral  
511 infection. *PLoS Pathog.* 2015;11(10):e1005203.
- 512 38. Zhang W, Jia K, Jia P, Xiang Y, Lu X, Liu W, et al. Marine medaka heat shock  
513 protein 90ab1 is a receptor for red-spotted grouper nervous necrosis virus and  
514 promotes virus internalization through clathrin-mediated endocytosis. *PLoS  
515 Pathog.* 2020;16(7):e1008668.
- 516 39. Le Y, Li Y, Jin Y, Jia P, Jia K, Yi M. Establishment and characterization of a brain  
517 cell line from sea perch, *Lateolabrax japonicus*. *In Vitro Cell Dev Biol Anim.*  
518 2017;53(9):834-840.
- 519 40. Zhang W, Weng J, Yao L, Jia P, Yi M, Jia K. Nectin4 antagonises type I interferon  
520 production by targeting TRAF3 for autophagic degradation and disrupting  
521 TRAF3-TBK1 complex formation. *Int J Biol Macromol.* 2022;218:654-664.

## 522 **Figure Legends**

523 **Fig. 1. RNF34 promotes RGNNV infection and inhibits IFN responses. (A-B)** LJB  
524 cells were transfected with *pCMV-Myc-RNF34* or *pCMV-Myc* plasmids (control), and  
525 infected with RGNNV for 24 h and 48 h, respectively. Then the cells were lysed for  
526 qRT-PCR to detect the expression of *RNF34* and *CP*. **(C-D)** qRT-PCR analysis of  
527 *RNF34* and *CP* mRNA expression in siRNF34 or NC (control) transfected LJB cells,  
528 following infection with RGNNV for 24 h. **(E-H)** qRT-PCR analysis of *IFN $\alpha$* , *ISG15*,  
529 *Viperin* and *MX* expression in *pCMV-Myc-RNF34* transfected LJB cells, following  
530 infection with RGNNV for 24 h. **(I)** Luciferase activity of IFN $\alpha$  promoter in FHM cells  
531 transfected with an increasing amount of *pCMV-Myc-RNF34* plasmid (0, 100, 250, and  
532 500 ng), together with reporter plasmids *pGL3-IFN $\alpha$ -pro-Luc* and renilla luciferase

---

533 plasmid *pRL-TK*. Data is collected from three independent experiments and presented  
534 as mean  $\pm$  S.D. \*  $p < 0.05$ ; \*\*  $p < 0.01$ .

535 **Fig. 2. RNF34 interacts with TBK1 and IRF3 through RING domain. (A-D)** HEK  
536 293T cells were transfected with *pCMV-Myc-RNF34* and *pCMV-Flag-MAVS*, *pCMV-*  
537 *Flag-TRAF3*, *pCMV-Flag-TBK1* or *pCMV-Flag-IRF3* plasmids, respectively. At 24 h  
538 post transfection, the cell lysates were subjected to co-immunoprecipitation analysis  
539 with anti-Myc magnetic beads as indicated. **(E-F)** *pCMV-Myc-RNF34* and *pCMV-Flag-*  
540 *TBK1* or *pCMV-Flag-IRF3* plasmids were transfected into HEK 293T cells for  
541 immunofluorescence analysis by using anti-Myc (red) and anti-Flag (green) antibodies.  
542 Nuclei were stained with DAPI. **(G-H)** Plasmids of RNF34 from zebrafish (zbRNF34)  
543 and marine medaka (mmRNF34) were transfected into HEK 293T cells, together with  
544 *pCMV-Myc-TBK1* or *pCMV-Myc-IRF3* plasmids, respectively. At 24 h post  
545 transfection, the cell lysates were subjected to co-immunoprecipitation analysis with  
546 anti-Flag magnetic beads as indicated. **(I-J)** HEK 293T cells were transfected with  
547 Flag-Tagged RNF34 mutant plasmids (RNF34 $\Delta$ RING and RNF34 $\Delta$ Zinc) as indicated  
548 for 24 h, the cell lysates were subjected to co-immunoprecipitation analysis with anti-  
549 Flag magnetic beads as above.

550 **Fig. 3. RNF34 inhibits TBK1 and IRF3-induced IFN responses. (A-B)** FHM cells  
551 were co-transfected with an increasing amount of *pCMV-Myc-RNF34* (0, 100, 200, and  
552 300 ng), *pGL3-IFN $\beta$ -pro-Luc* and *pRL-TK*, together with *pCMV-Flag-TBK1* (A) or  
553 *pCMV-Flag-IRF3* (B) plasmids, respectively, for luciferase activity analysis. **(C-D)**  
554 RNF34 mutant plasmids were transfected into FHM cells for 24 h, along with *pCMV-*

---

555 *Myc-TBK1* (C) or *pCMV-Myc-IRF3* (D) plasmids, respectively. Reporter assays were  
556 performed as above (n = 3). \*  $p < 0.05$ ; \*\*  $p < 0.01$ .

557 **Fig. 4. RNF34 enhances the degradation of TBK1 and IRF3.** (A-B) qRT-PCR  
558 analysis of *RNF34*, *TBK1* and *IRF3* mRNA expression in LJB cells with *pCMV-Myc-*  
559 *RNF34* overexpressed (A) or RNF34-knock down (B), following infection with  
560 RGNNV for 24 h. (C-D) HEK 293T cells were transfected with the empty vector or  
561 *pCMV-Myc-RNF34* plasmid (0, 0.5, and 1  $\mu$ g), together with *pCMV-Flag-TBK1* (C) or  
562 *pCMV-Flag-IRF3* (D) plasmids, respectively. At 24 h post transfection, the cells were  
563 lysed for immunoblot assays with indicated antibodies. (E-F) LJB cells transfected with  
564 *pCMV-Myc-RNF34* (0, 1.5, and 3  $\mu$ g) without (E) or with RGNNV infection (F) were  
565 subjected to immunoblot assays using anti-TBK1 and anti-IRF3 antibodies.

566 **Fig. 5. RNF34 promotes the K27 and K48-ubiquitination of TBK1 and IRF3.** (A-  
567 B) HEK 293T cells were transfected with *pCMV-Myc-RNF34* plasmid, along with the  
568 *pCMV-Flag-TBK1* (A) or *pCMV-Flag-IRF3* (B) plasmids, and then stimulated with  
569 increasing amount of MG132 (10 and 20  $\mu$ M) for 6 h. The cells were lysed for  
570 immunoblot assays with indicated antibodies. (C-D) HEK 293T cells were  
571 cotransfected with *pCMV-Myc-RNF34*, *HA-K27*, *HA-K48*, or *HA-K63*, along with the  
572 *pCMV-Flag-TBK1* (C) or *pCMV-Flag-IRF3* (D) plasmids for 24 h. Afterwards, the  
573 cells were lysed for co-immunoprecipitation analysis with anti-Flag antibodies as  
574 indicated. (E-F) Luciferase activity of IFN $\beta$  promoter in FHM cells transfected with  
575 *pCMV-Myc-RNF34*, *HA-K27*, *HA-K48*, or *HA-K63*, along with the *pCMV-Flag-TBK1*



---

576 (E) or *pCMV-Flag-IRF3* (F) plasmids for 24 h. Data is collected from three independent  
577 experiments and presented as mean  $\pm$  SD. \*  $p < 0.05$ ; \*\*  $p < 0.01$ .

578 **Fig. 6. RNF34 diminishes TBK1-induced translocation of IRF3 from cytoplasm to**  
579 **nucleus. (A)** *pCMV-Myc-RNF34* and *pCMV-Flag-TBK1* or *pEGFP-IRF3* plasmids  
580 were transfected into HEK 293T cells as indicated for immunofluorescence analysis by  
581 using anti-Myc (red) and anti-Flag (purple) antibodies. Nuclei were stained with DAPI.  
582 **(B)** HEK 293T cells were transfected with *pEGFP-IRF3* plasmid, along with *pCMV-*  
583 *Flag-TBK1* or *pCMV-Myc-RNF34* plasmids, then the cells were lysed for the  
584 cytoplasmic proteins, nuclear proteins and total proteins extraction and subjected to  
585 immunoblot assays using anti-GFP, anti-Flag, anti-Myc, anti-Lamin B1 and anti-Actin  
586 antibodies.

587 **Fig. 7. NNV capsid protein (CP) binds with RNF34. (A-B)** HEK 293T cells were  
588 transfected with *pCMV-Myc-RNF34* and *pCMV-Flag-CP* plasmids as indicated for 24  
589 h, the cell lysates were subjected to co-immunoprecipitation analysis with anti-Flag (A)  
590 or anti-Myc (B) magnetic beads as above. **(C)** His-CP or His proteins were purified to  
591 pull-down the protein lysates of HEK 293T cells transfected with *pCMV-Flag-RNF34*  
592 plasmids, the cell lysates were subjected to pull-down analysis with anti-His magnetic  
593 beads. **(D)** *pCMV-Myc-RNF34* and *pCMV-Flag-CP* plasmids were transfected into  
594 HEK 293T cells for immunofluorescence analysis by using anti-Myc (red) and anti-  
595 Flag (green) antibodies. Nuclei were stained with DAPI. **(E)** Plasmids of *pCMV-Flag-*  
596 *RNF34* from zebrafish and marine medaka were transfected into HEK 293T cells,  
597 together with *pCMV-Myc-CP* plasmids for 24 h, the cell lysates were subjected to co-

---

598 immunoprecipitation analysis with anti-Flag magnetic beads as above. **(F)** HEK 293T  
599 cells were transfected with CP mutant plasmids (CP $\Delta$ ARM, CP $\Delta$ arm, CP $\Delta$ S, CP $\Delta$ L,  
600 and CP $\Delta$ P) as indicated for 24 h, the cell lysates were subjected to co-  
601 immunoprecipitation analysis with anti-Myc magnetic beads as above.

602 **Fig. 8. CP induces TBK1 and IRF3 degradation and IFN suppression depended**  
603 **on RNF34.** **(A)** HEK 293T cells were transfected with the *pCMV-Flag-TBK1* and  
604 *pCMV-Myc-CP* plasmids (0, 0.5, and 1  $\mu$ g) for 24 h, the cells were then lysed for  
605 immunoblot assays with indicated antibodies. **(B)** LJB cells transfected with *pCMV-*  
606 *Myc-CP* plasmid (0, 0.5, and 1  $\mu$ g) for 24 h, and then were subjected to immunoblot  
607 assays using anti-TBK1 antibodies. **(C)** HEK 293T cells were transfected with *pCMV-*  
608 *Flag-TBK1* and *pCMV-Myc-CP* plasmids, followed by stimulation with increasing  
609 amount of MG132 (10 and 20  $\mu$ M) for 6 h, the cells were lysed for immunoblot assays  
610 with indicated antibodies. **(D)** HEK 293T cells were transfected with *pCMV-Myc-CP*  
611 plasmids, along with the NC or siRNF34 (50 and 100 nm), or 100 nm siRNF34 plus  
612 *pCMV-Flag-RNF34* plasmids. At 24 h post transfection, the cell lysates were subjected  
613 to immunoblot assays with indicated antibodies. **(E)** Luciferase activity of IFN $\beta$   
614 promoter in FHM cells transfected with *pCMV-Myc-CP* plasmids, along with the NC  
615 or siRNF34 (50 and 100 nm), or 100 nm siRNF34 plus *pCMV-Flag-RNF34* for 24 h.  
616 Data is collected from three independent experiments and presented as mean  $\pm$  SD. \*  $p$   
617  $< 0.05$ ; \*\*  $p < 0.01$ .

618 **Fig. 9. A proposed working model of NNV evades antiviral innate immunity by**  
619 **inhibiting RIG-I-like receptor-mediated signaling via RNF34.** CP interacted with

620 RNF34 and utilized RNF34 to promote K27- and K48-linked ubiquitination and  
621 degradation of TBK1 and IRF3, thus impeding the translocation of IRF3 into the  
622 nucleus, finally suppressing the production of IFN. Schematic figure was drawn by  
623 Figdraw.

## 624 **Supplementary information**

### 625 **S1 Fig. RNF34-mediated degradation of TBK1 and IRF3 is not affected by NH<sub>4</sub>Cl.**

626 HEK 293T cells were transfected with *pCMV-Myc-RNF34* plasmids, along with  
627 the *pCMV-Flag-TBK1* (**A**) or *pCMV-Flag-IRF3* (**B**) plasmids, and then stimulated  
628 with increasing amount of NH<sub>4</sub>Cl (10 and 20 μM) for 6 h, the cells were lysed for  
629 immunoblot assays with indicated antibodies.

### 630 **S1 Table. The sequence and PCR efficiency of primers used in this study.**

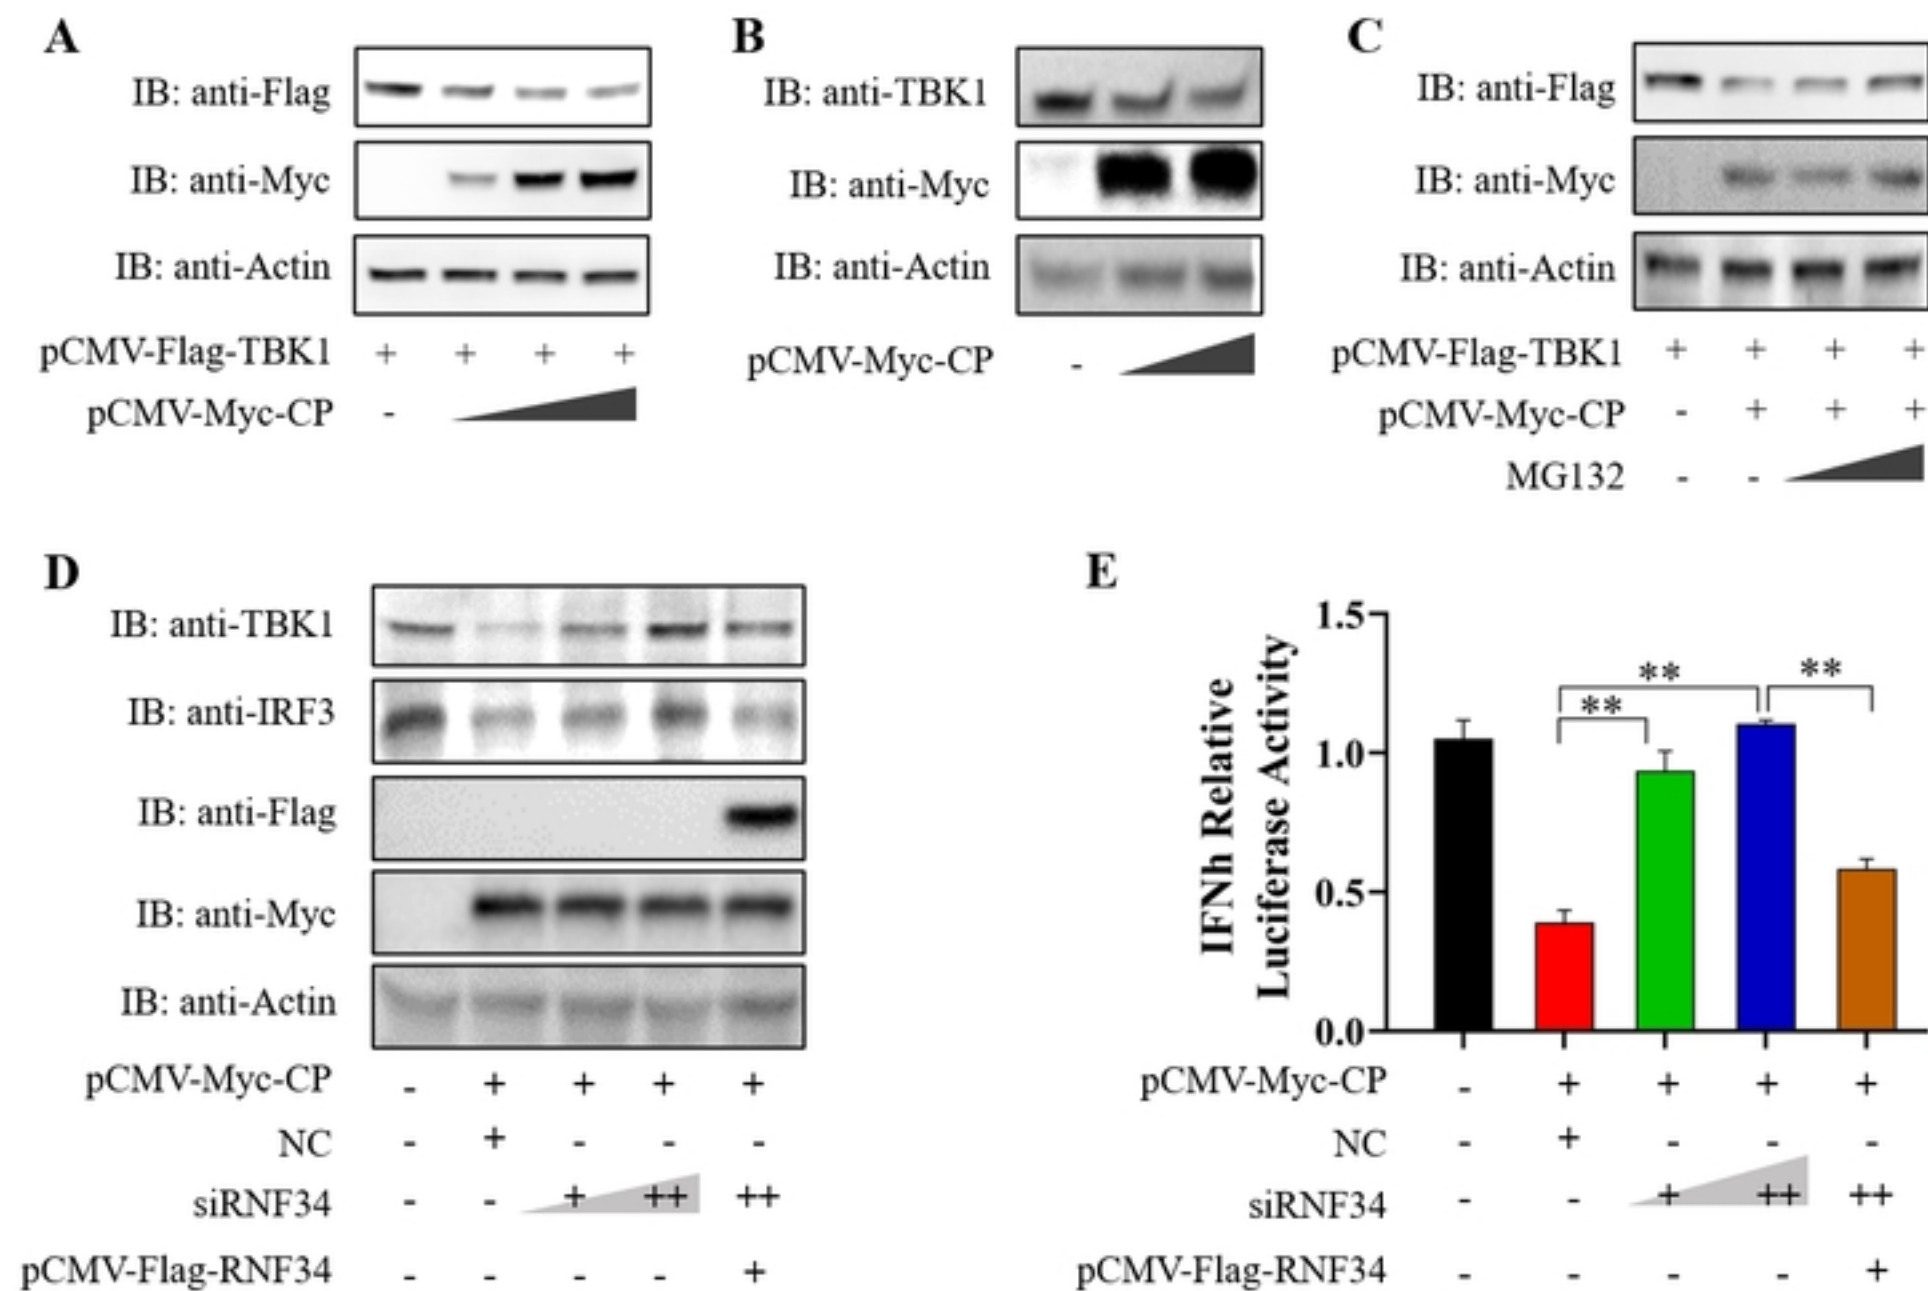

Figure 8

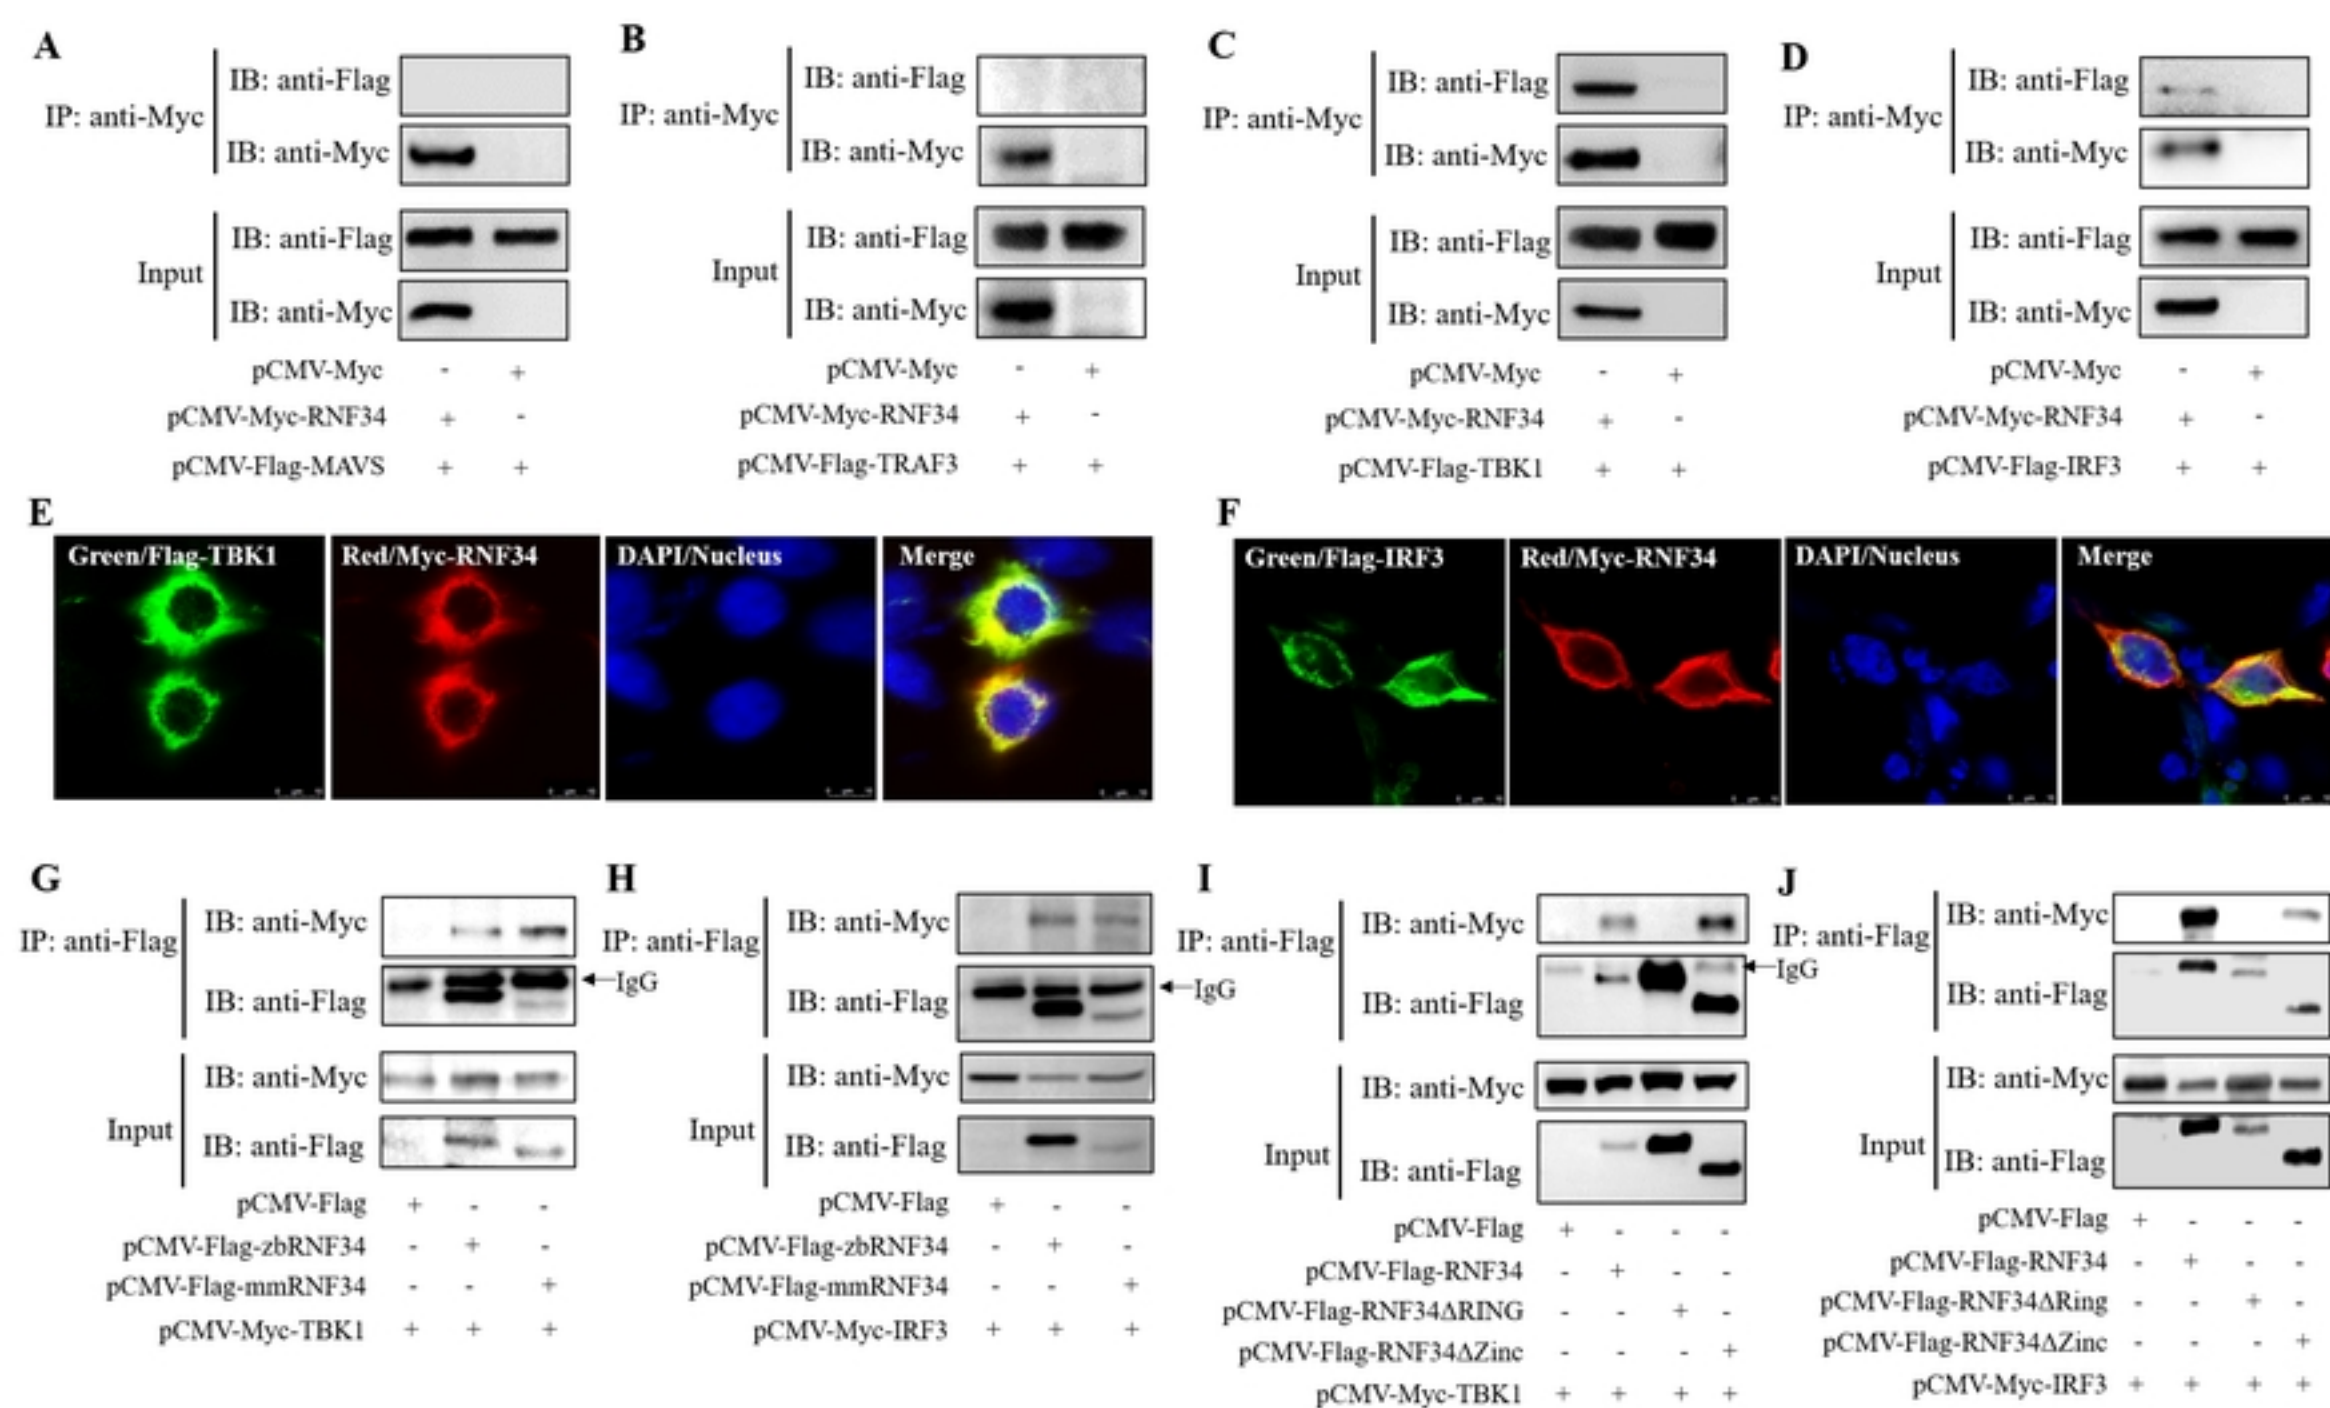

Figure 2

**A**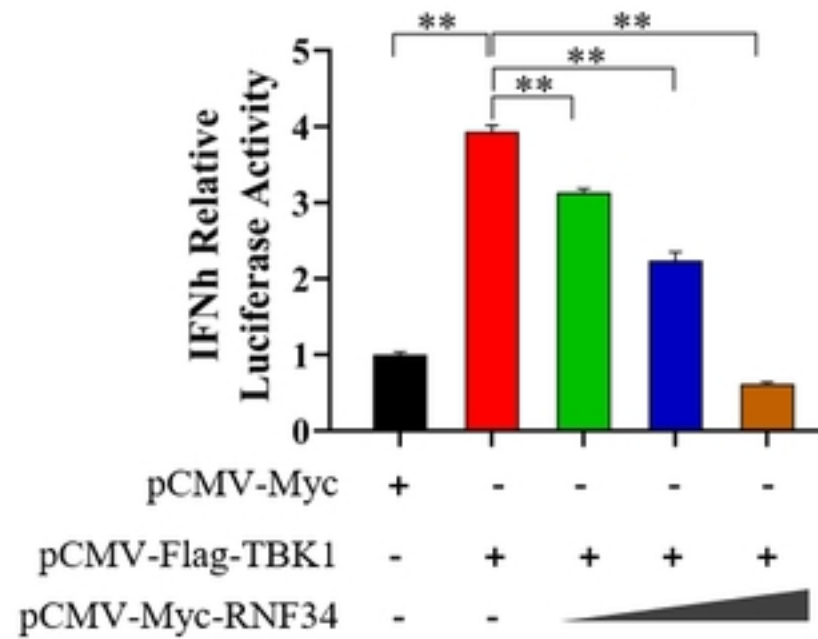**B**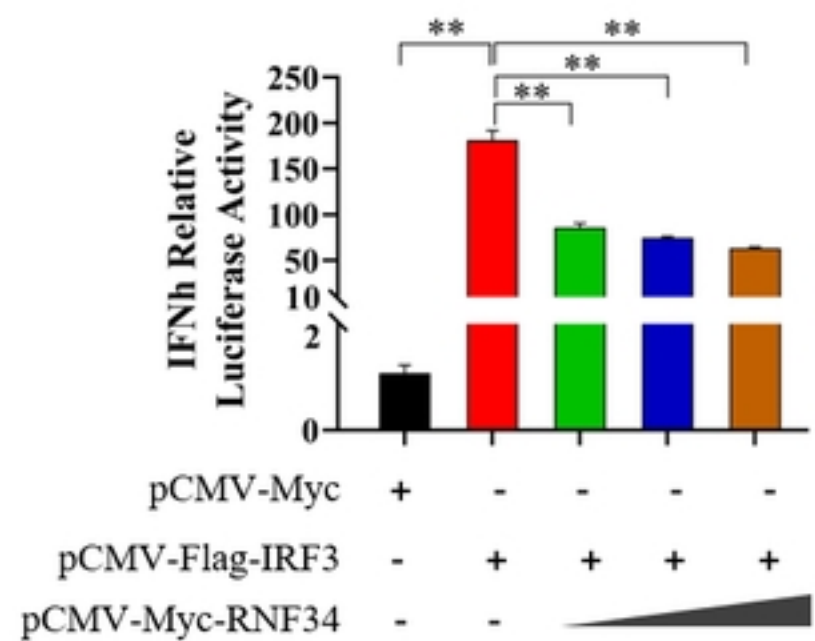**C**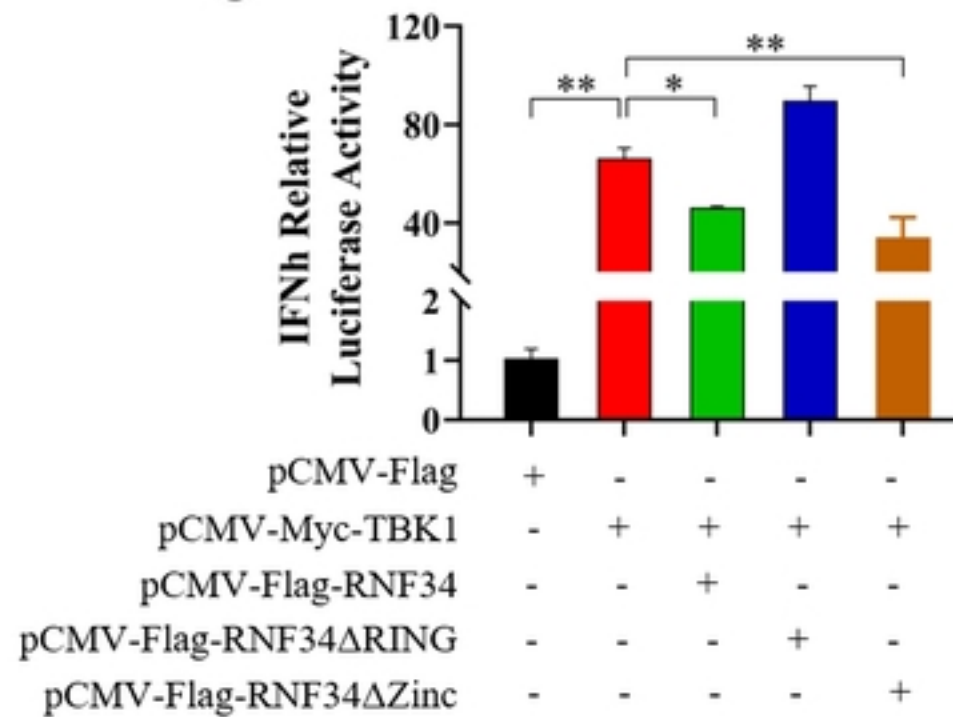**D**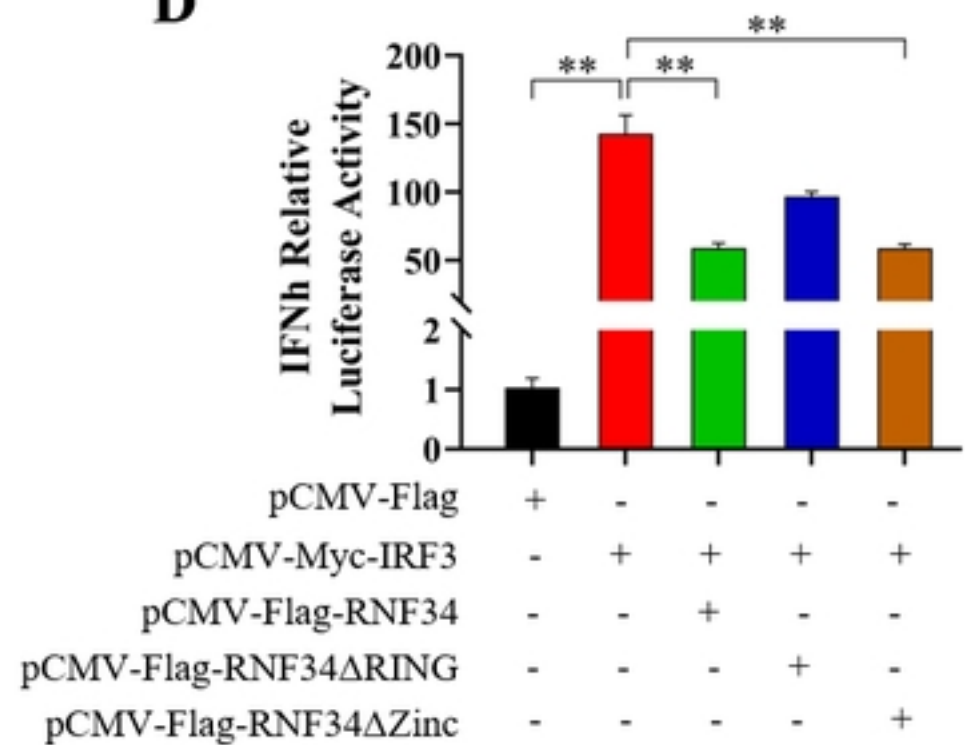

Figure 3

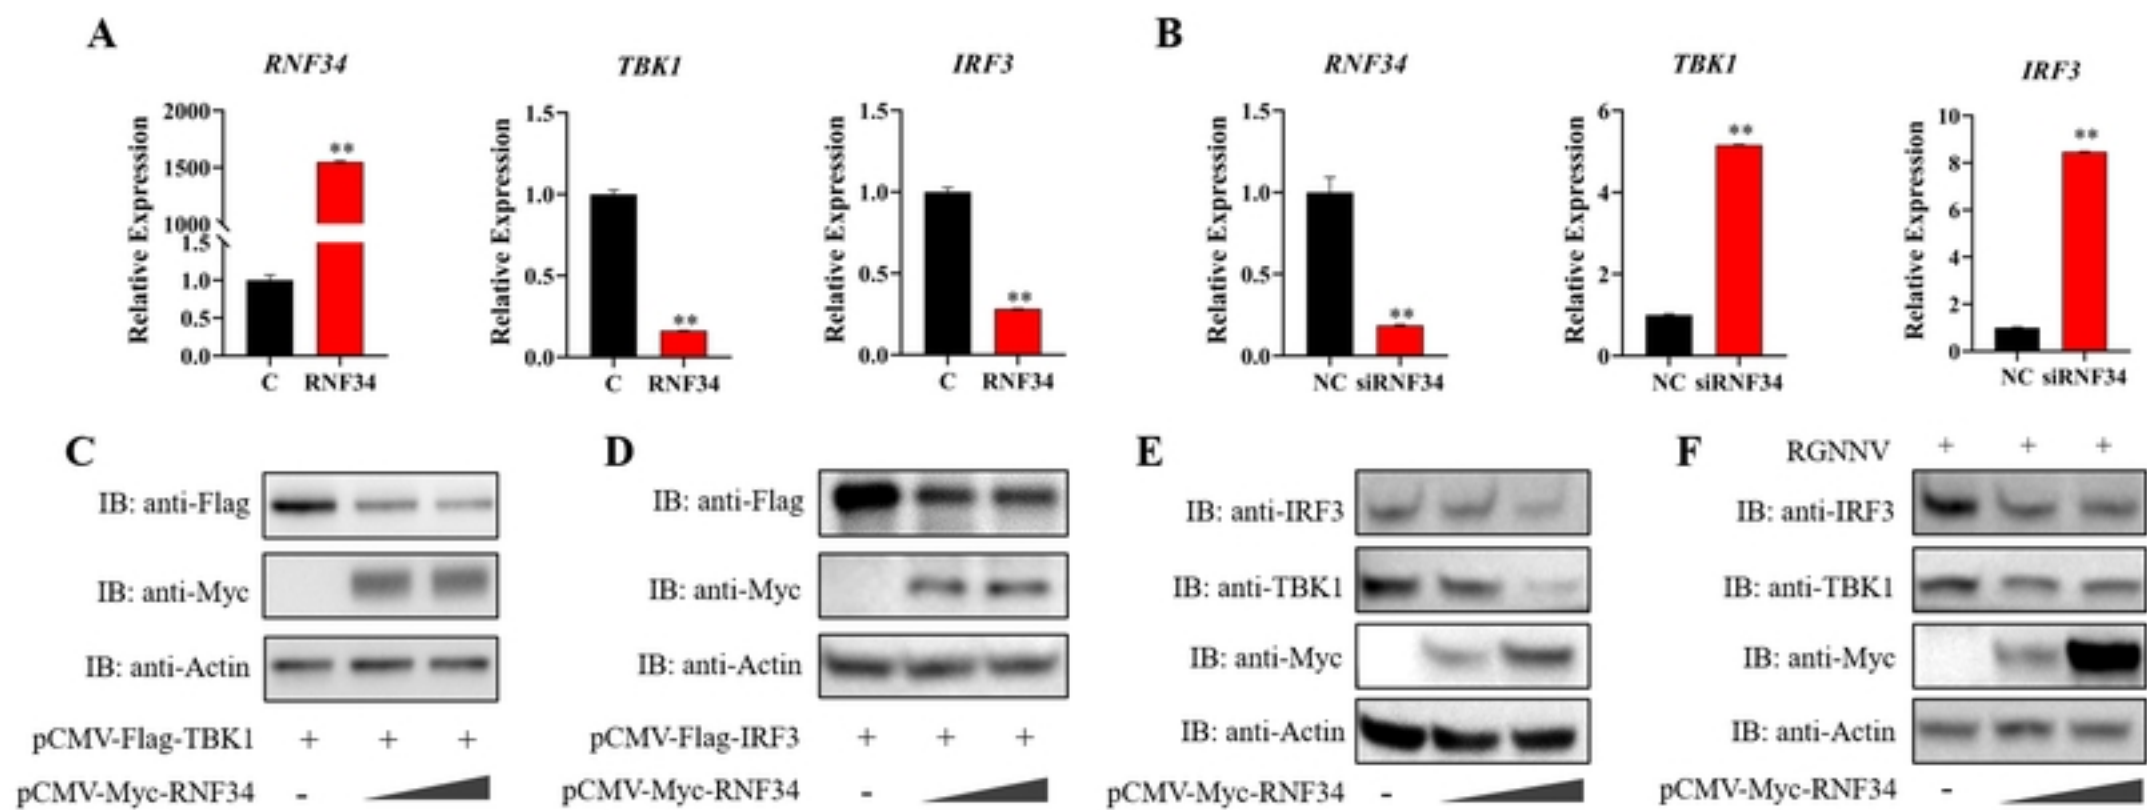

Figure 4

**A**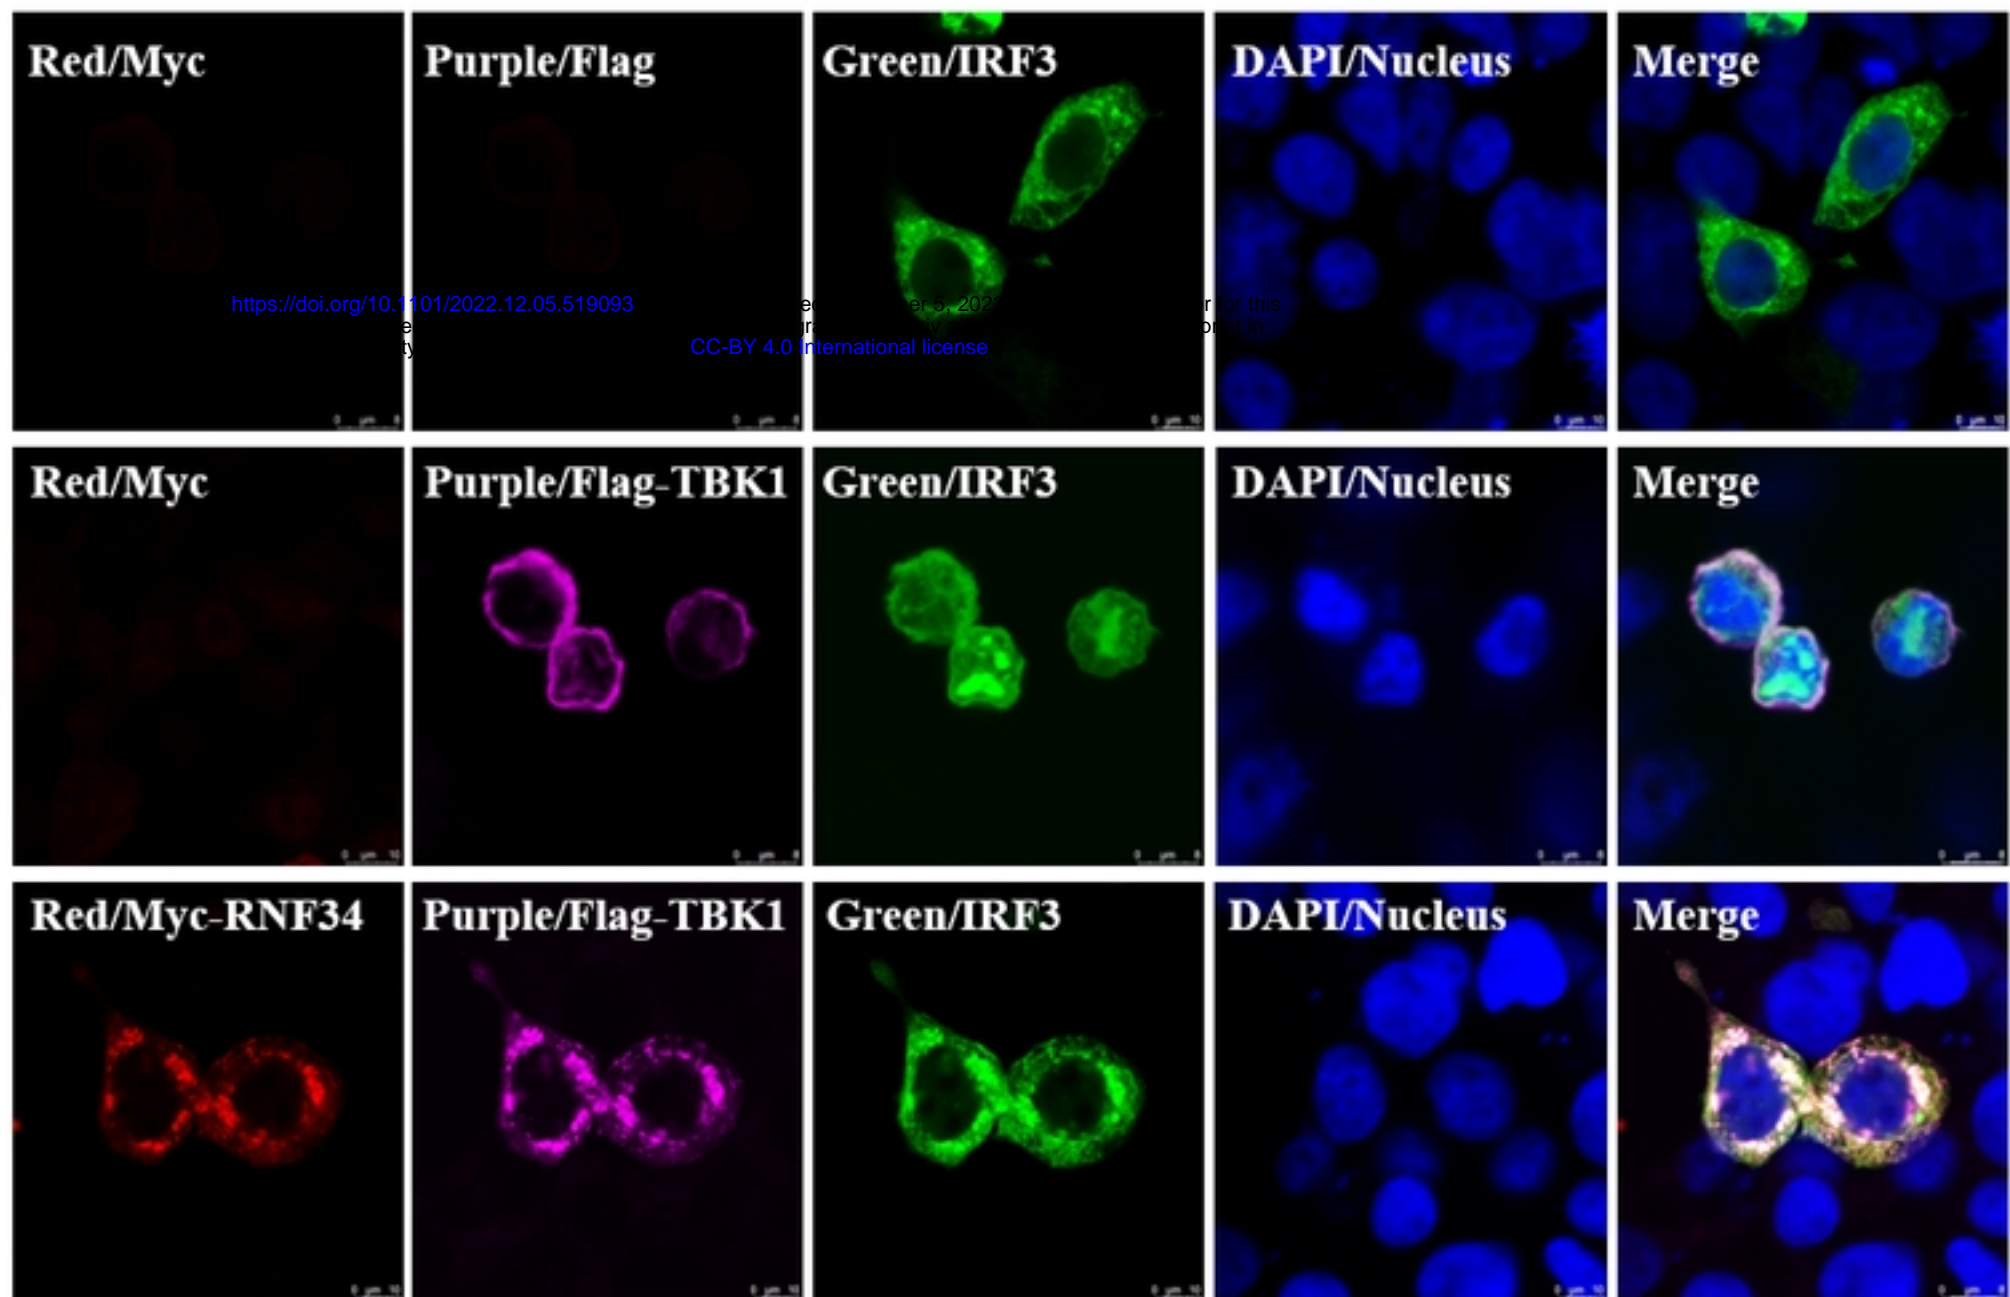**B**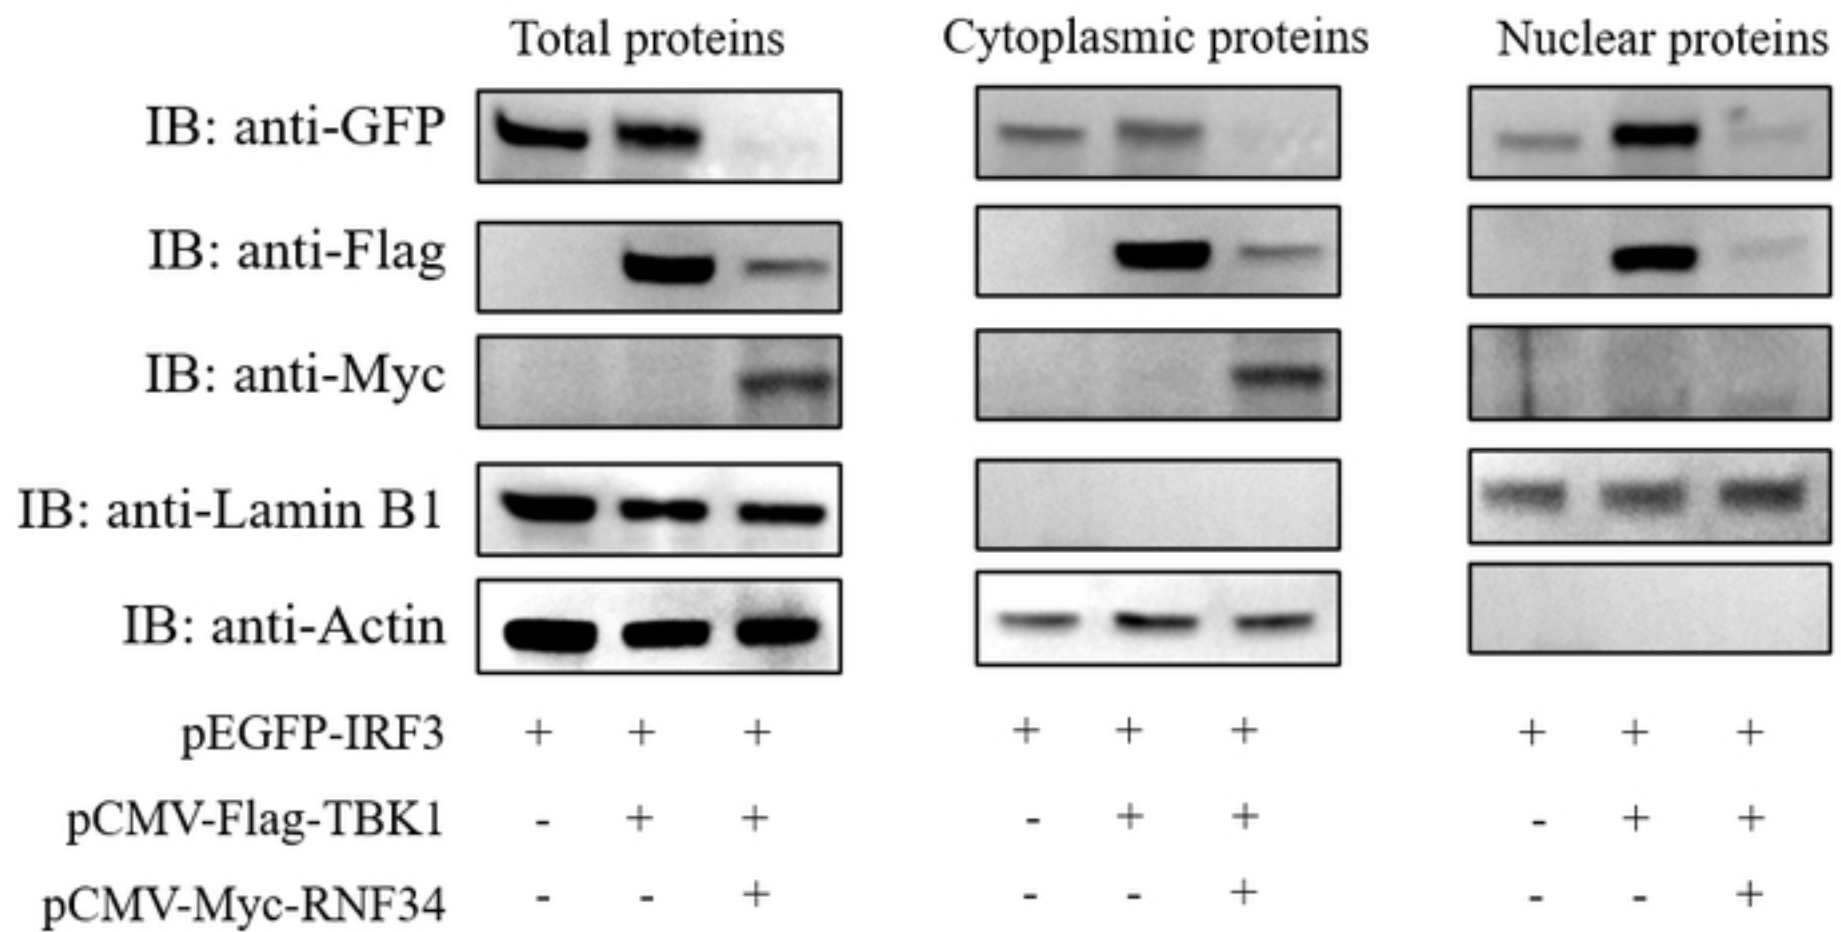

Figure 6



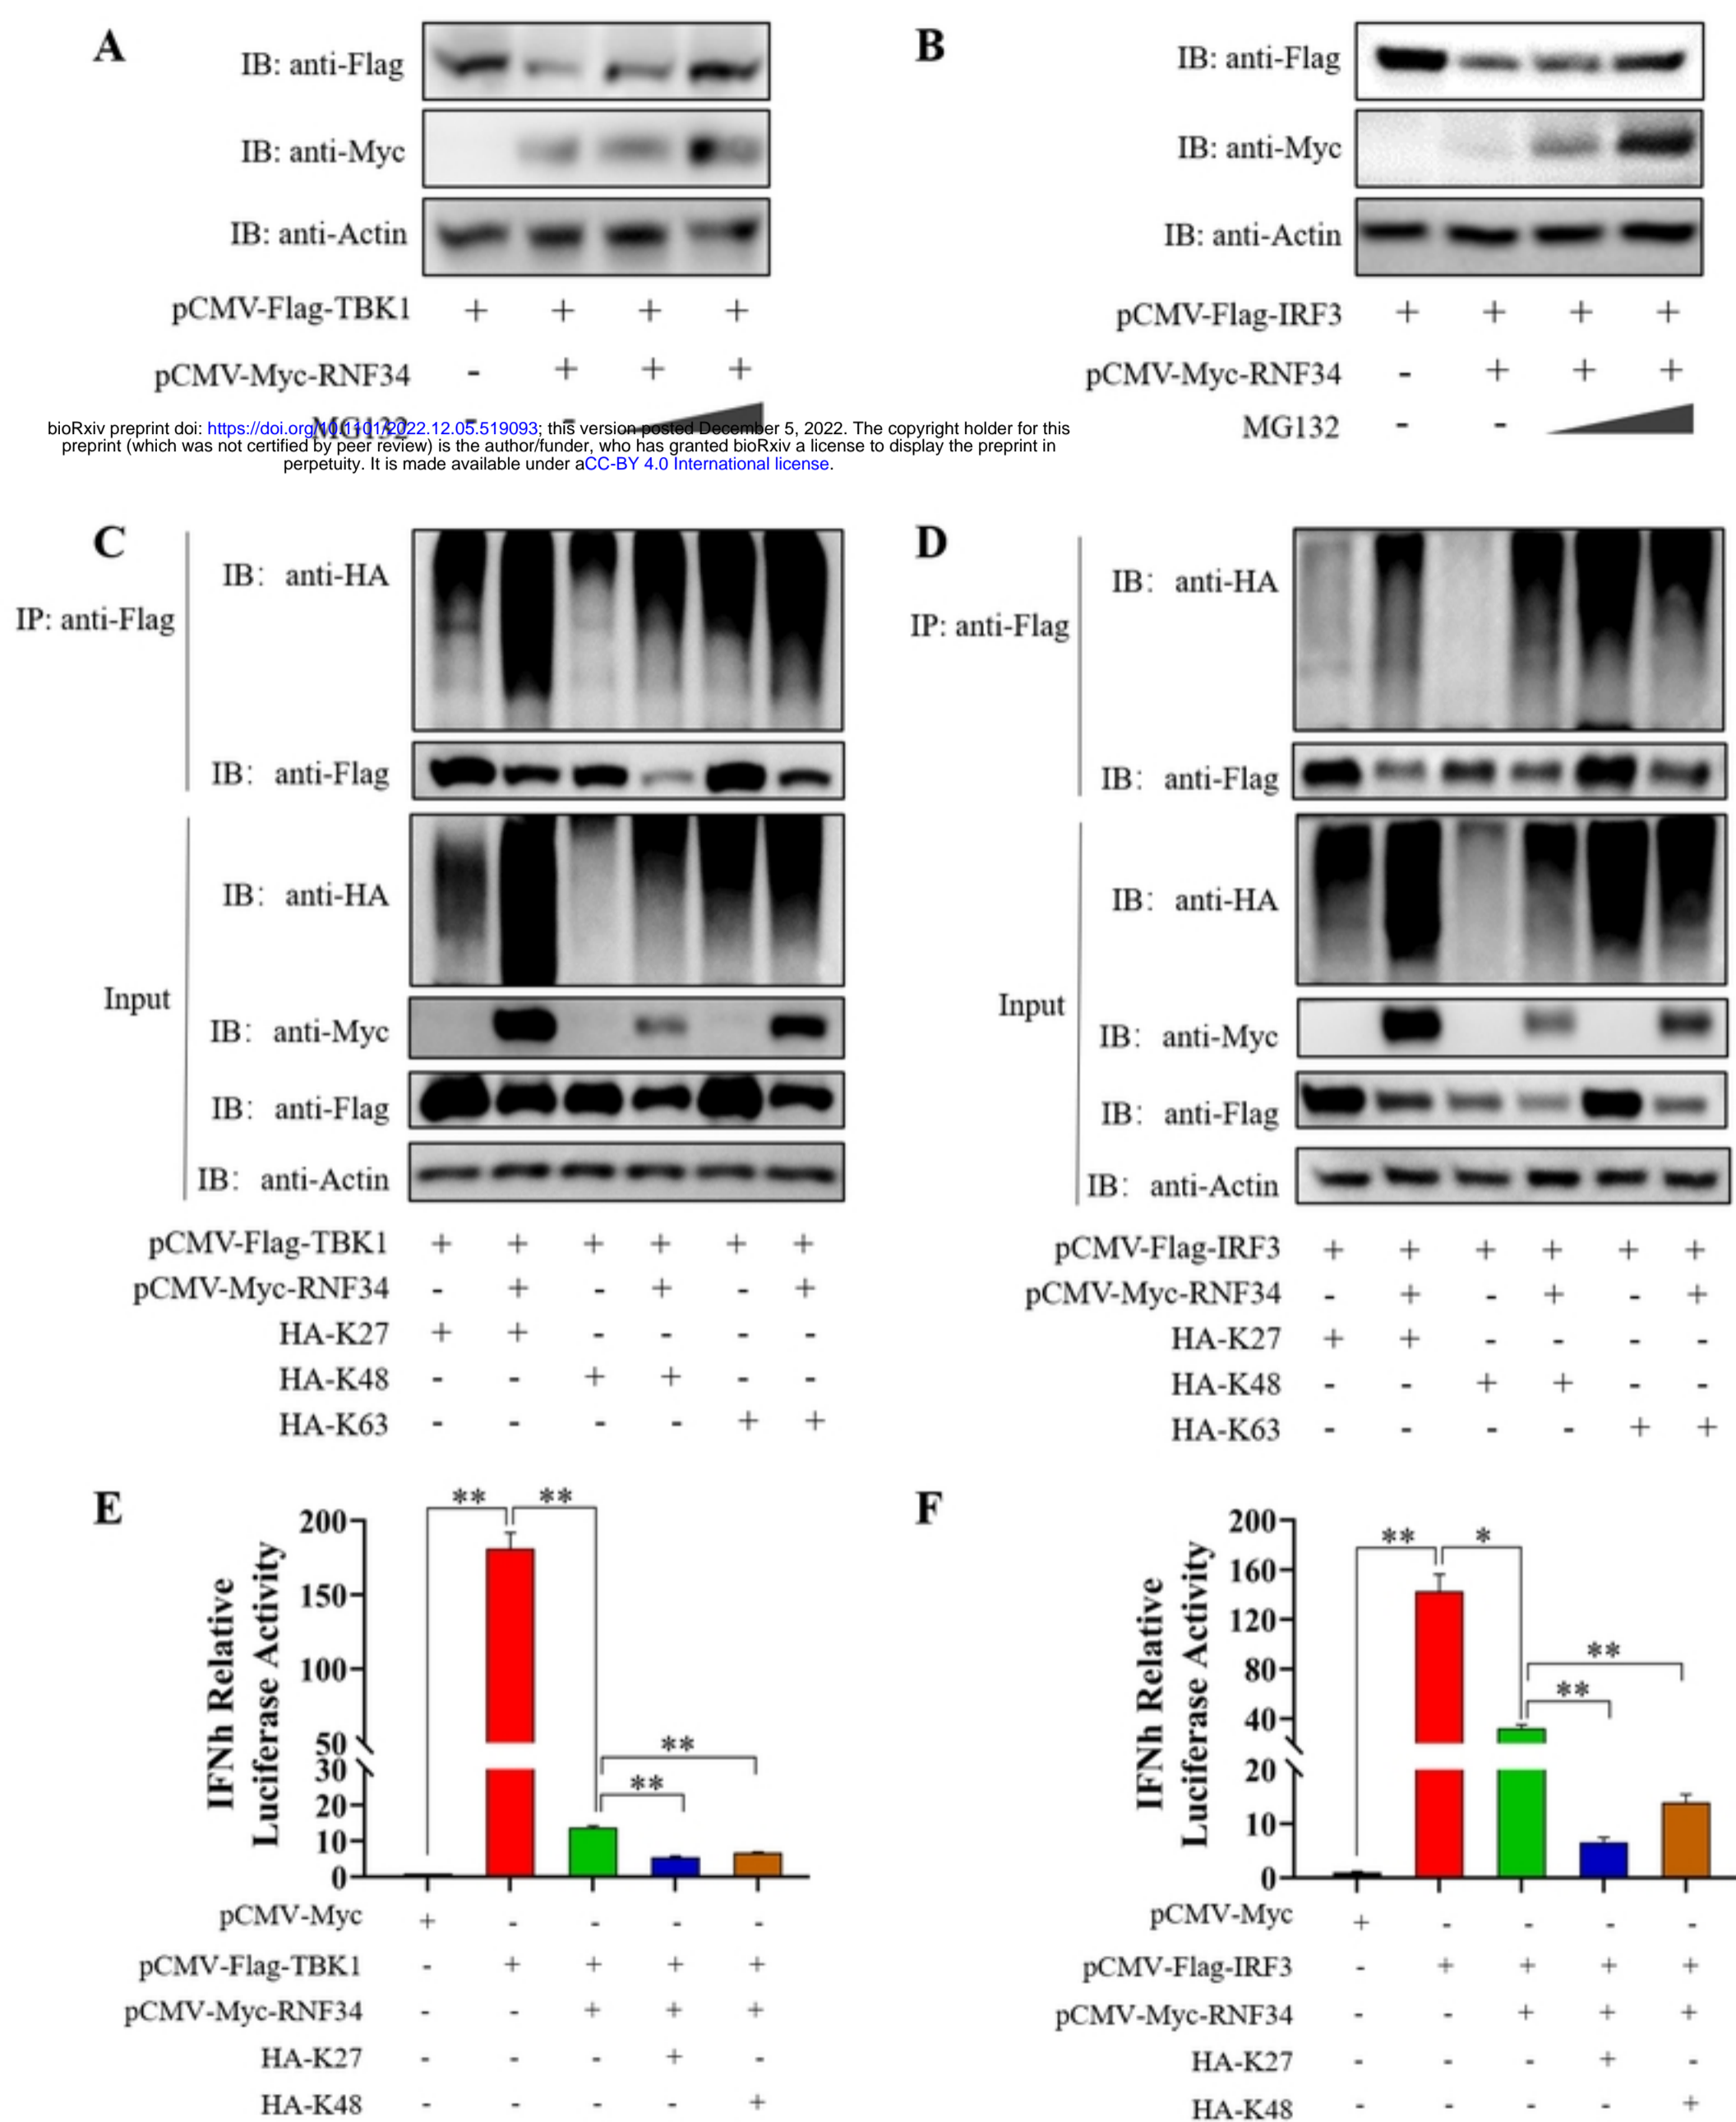

bioRxiv preprint doi: <https://doi.org/10.1101/2022.12.05.519093>; this version posted December 5, 2022. The copyright holder for this preprint (which was not certified by peer review) is the author/funder, who has granted bioRxiv a license to display the preprint in perpetuity. It is made available under aCC-BY 4.0 International license.

Figure 5

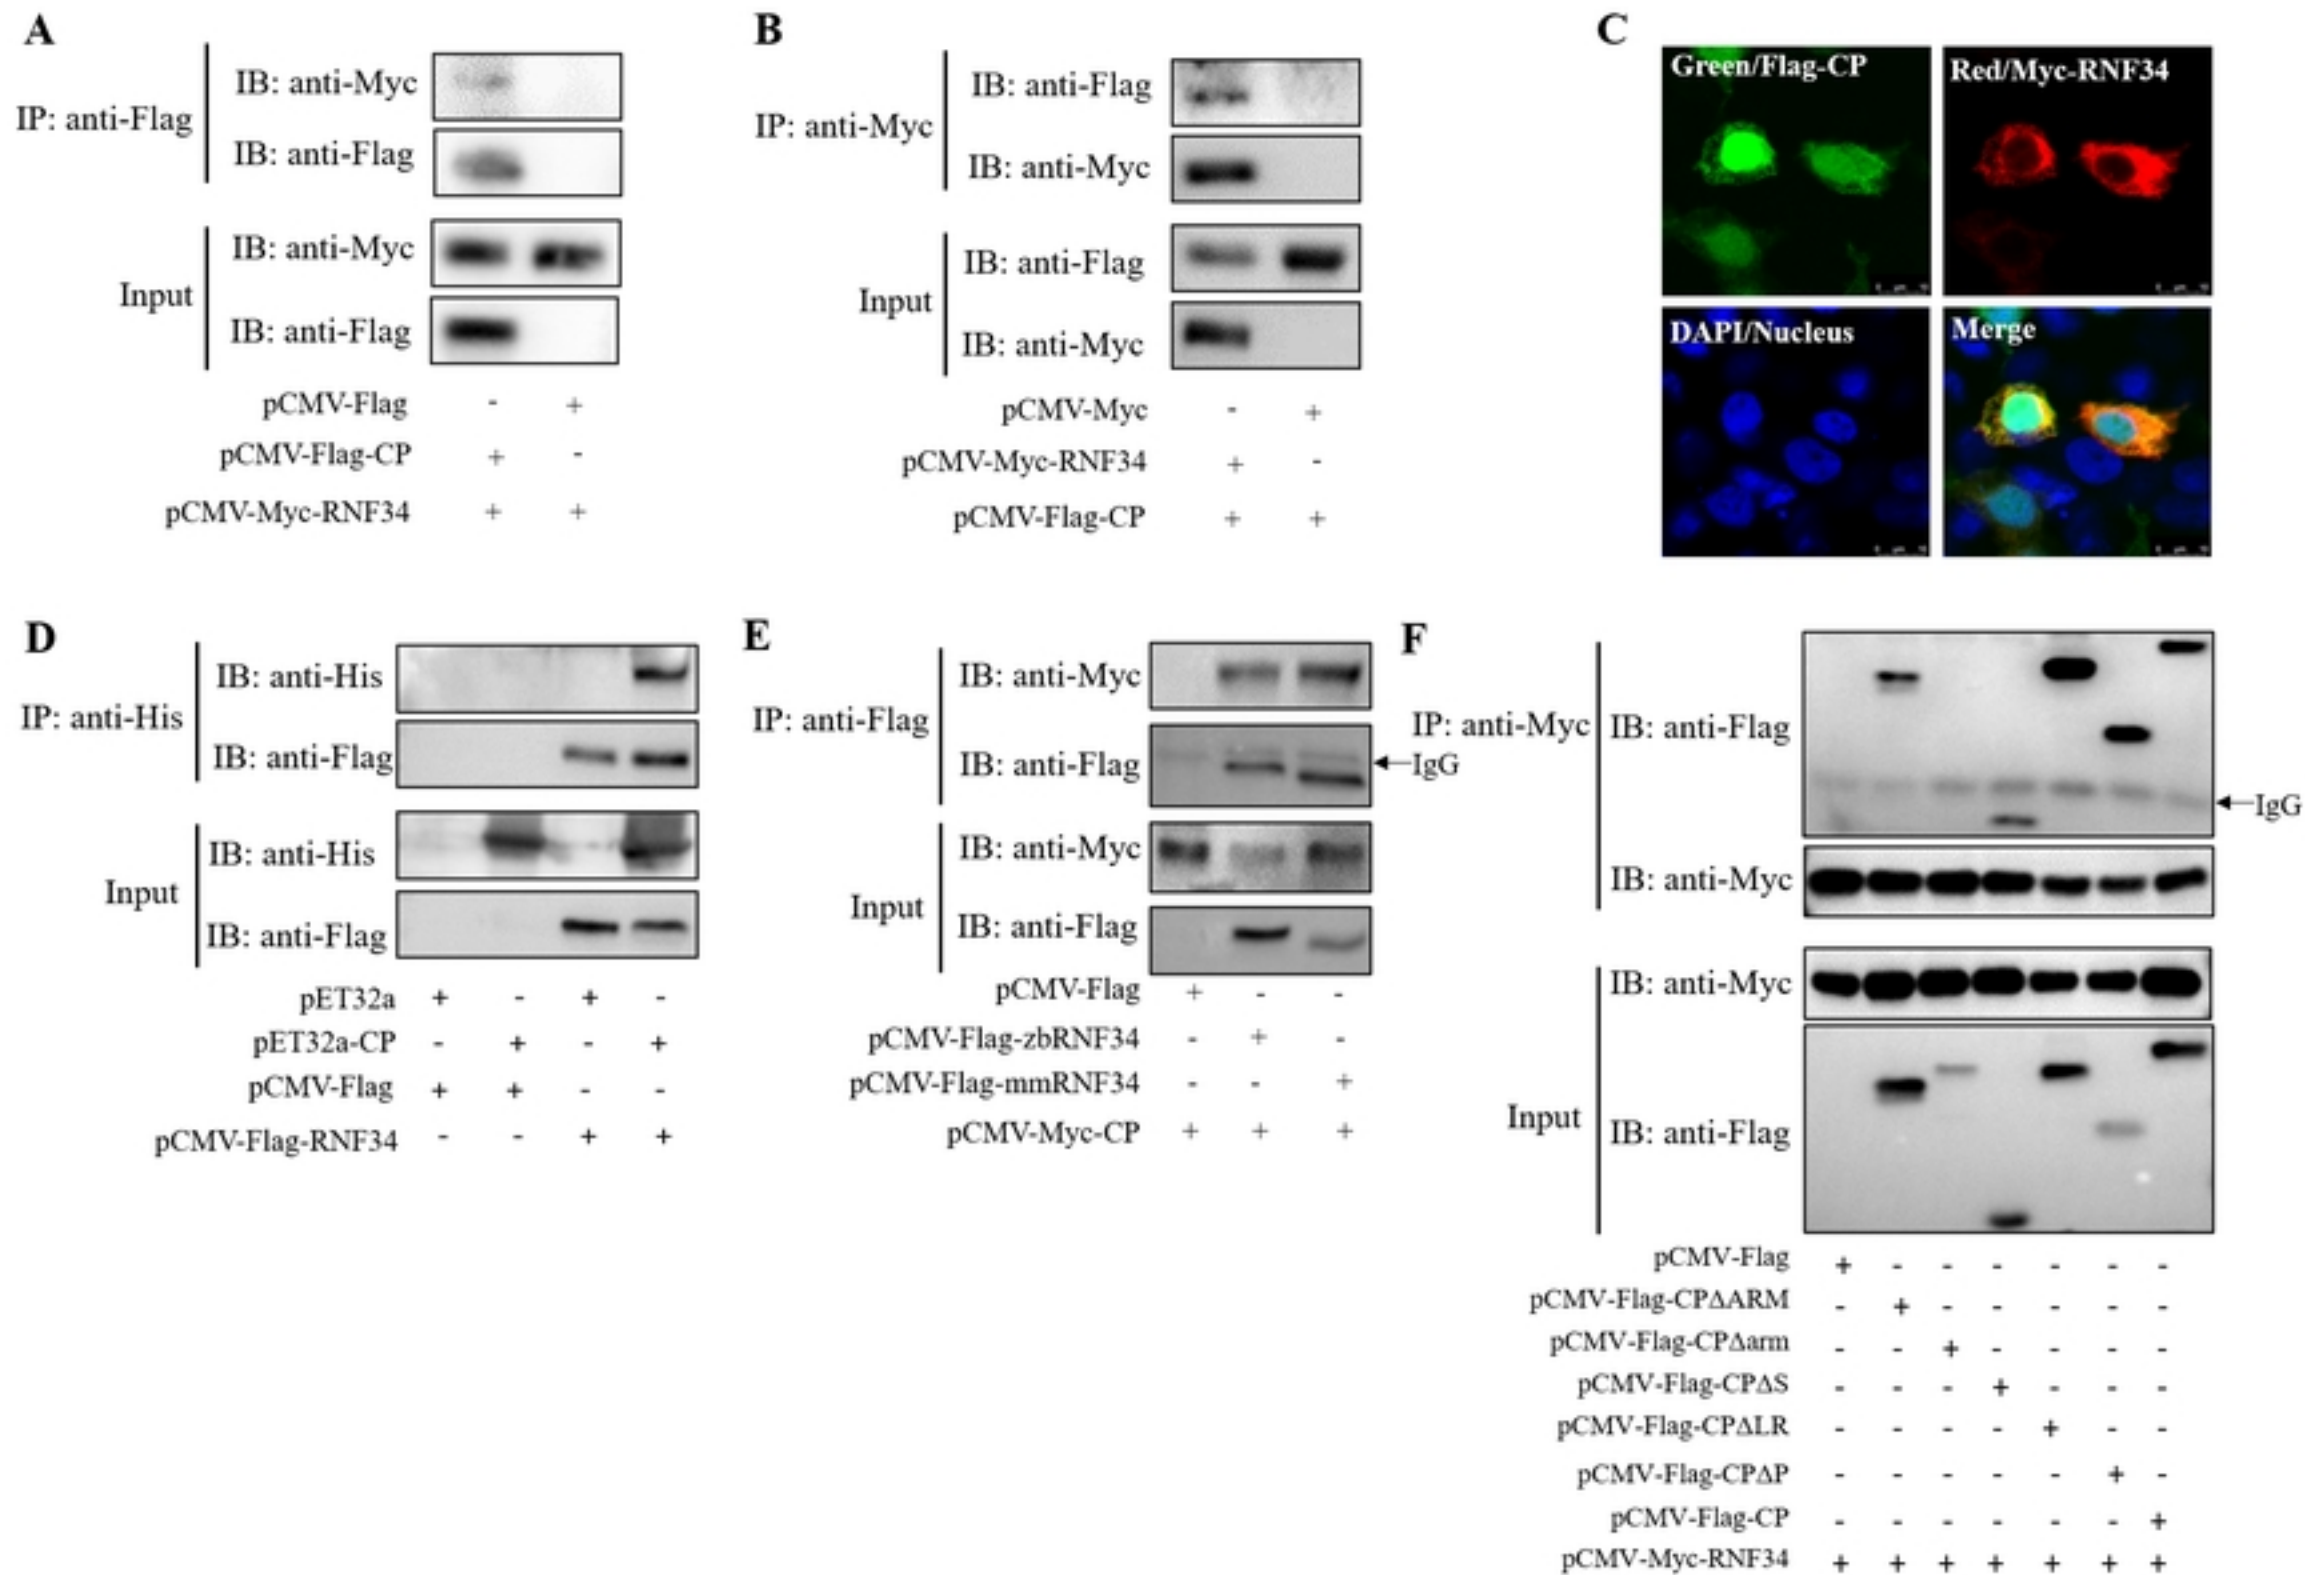

Figure 7

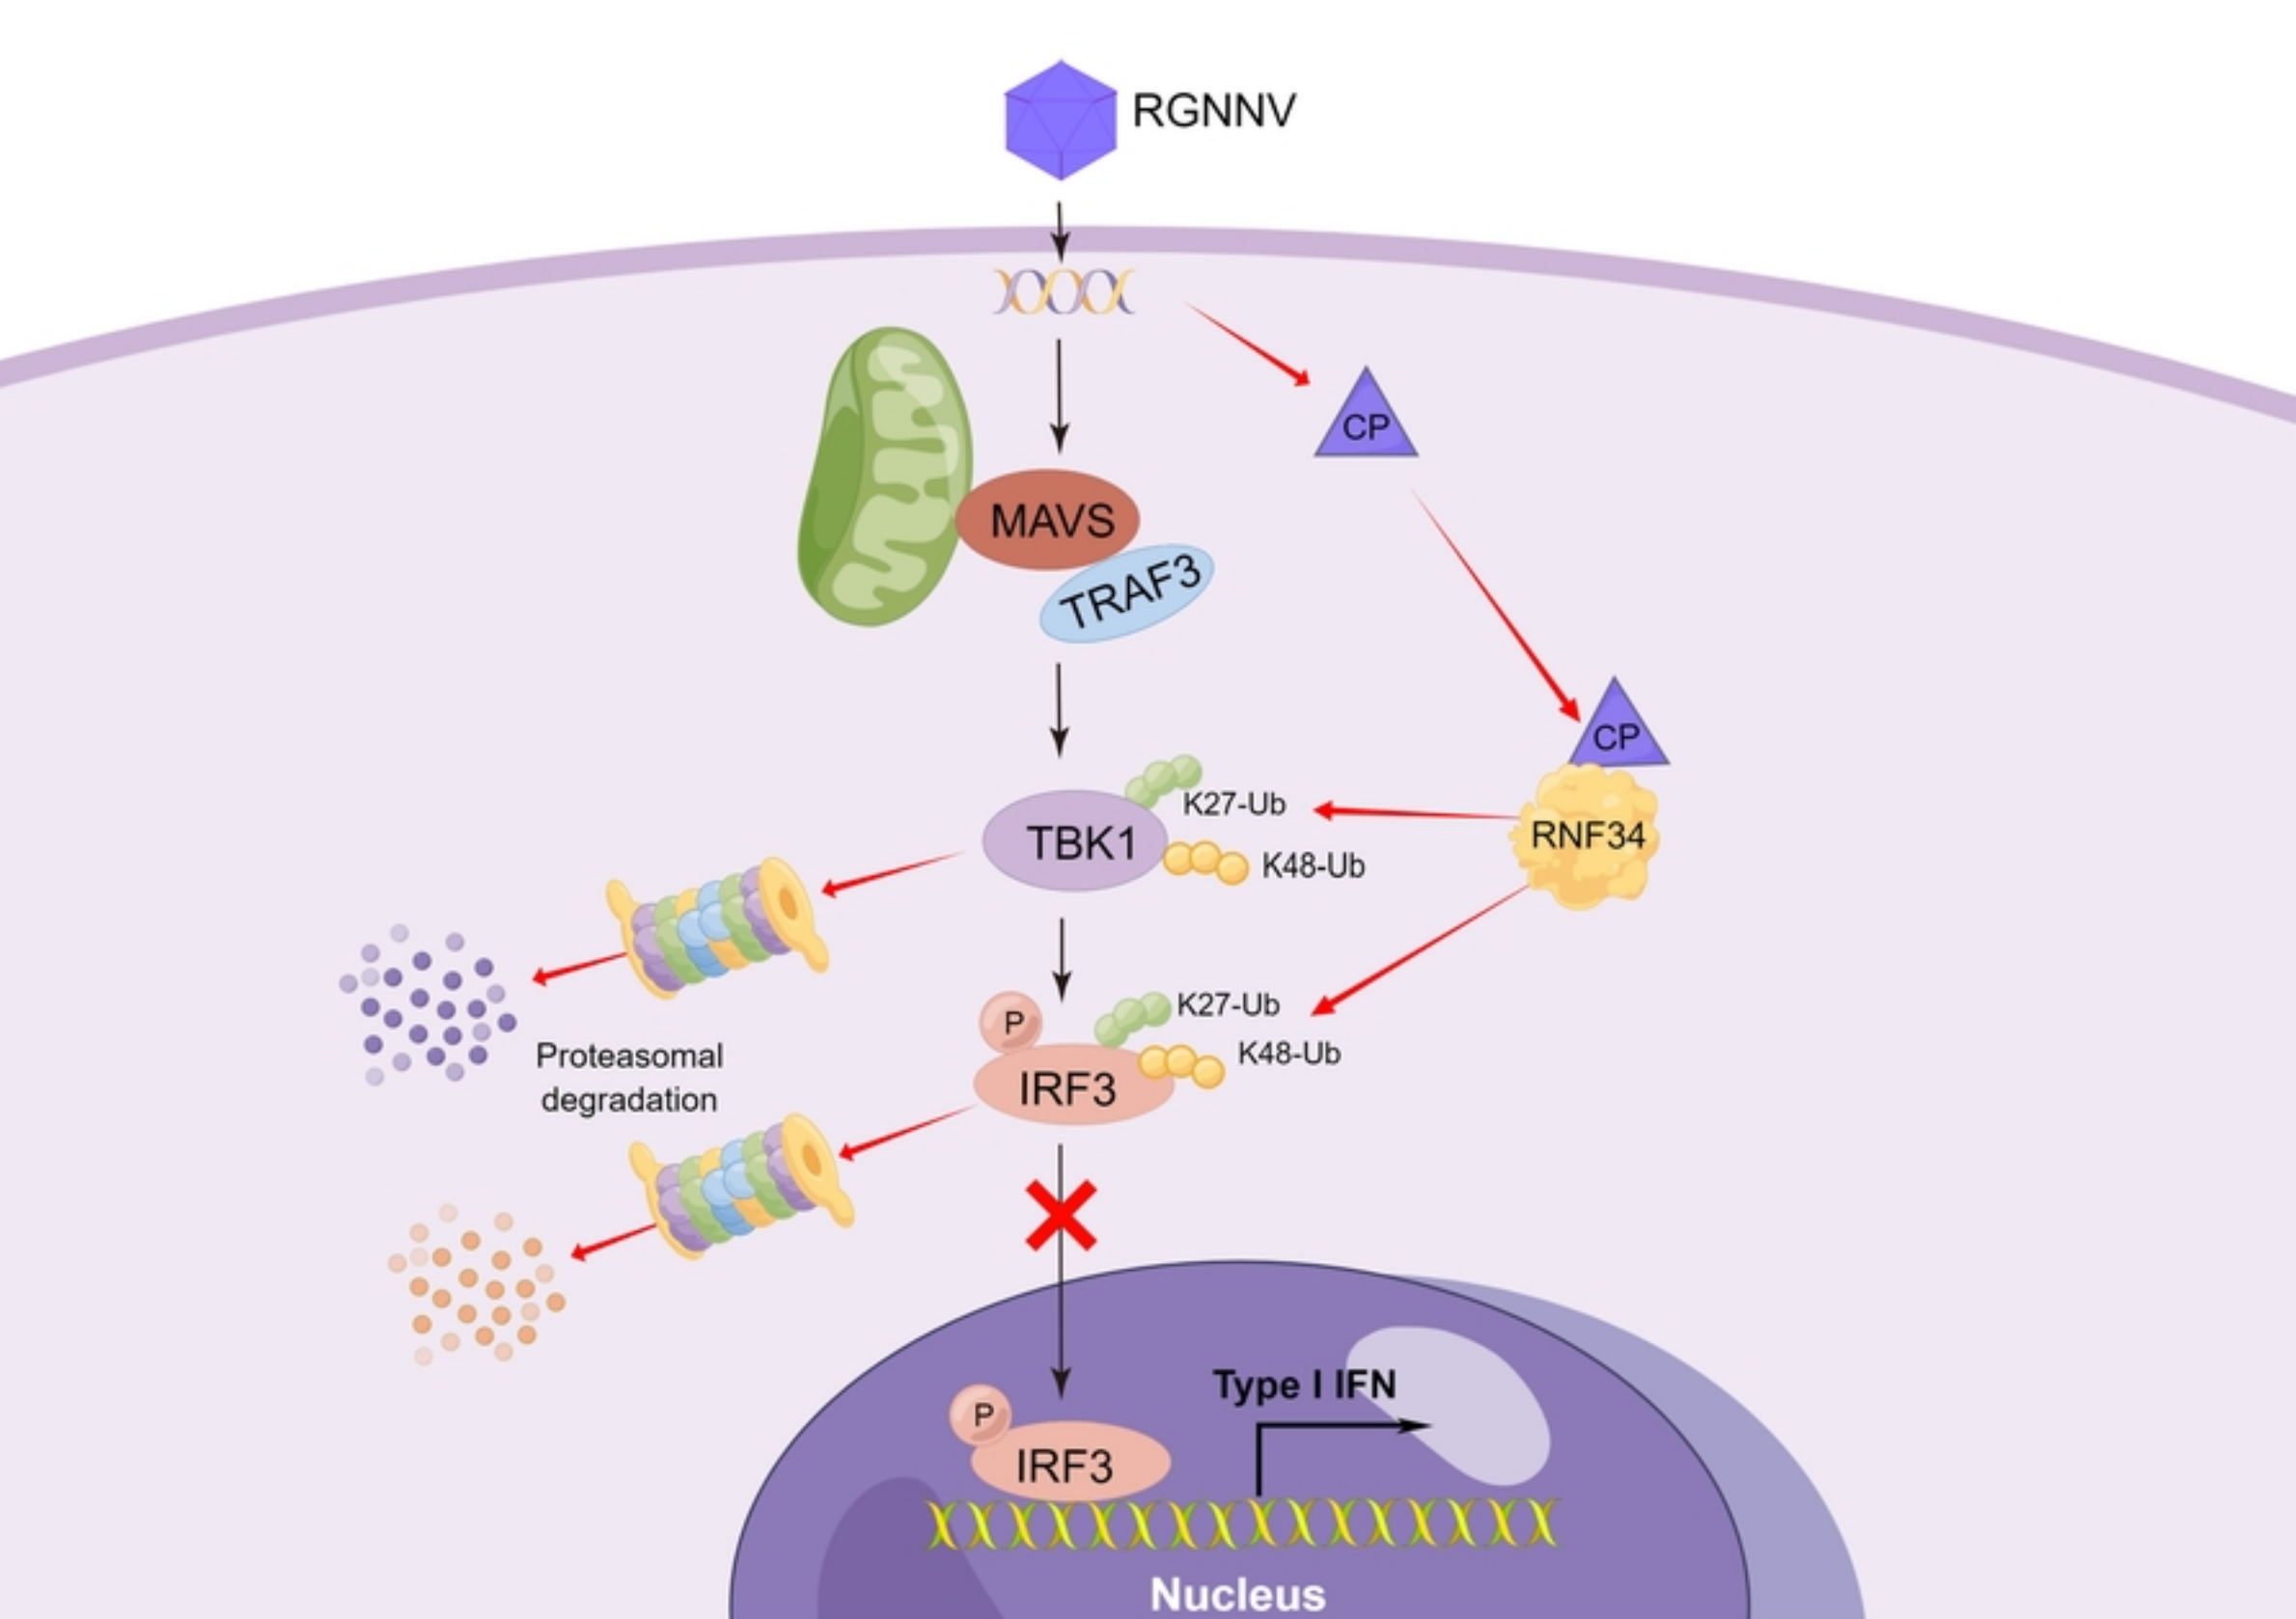

Figure 9

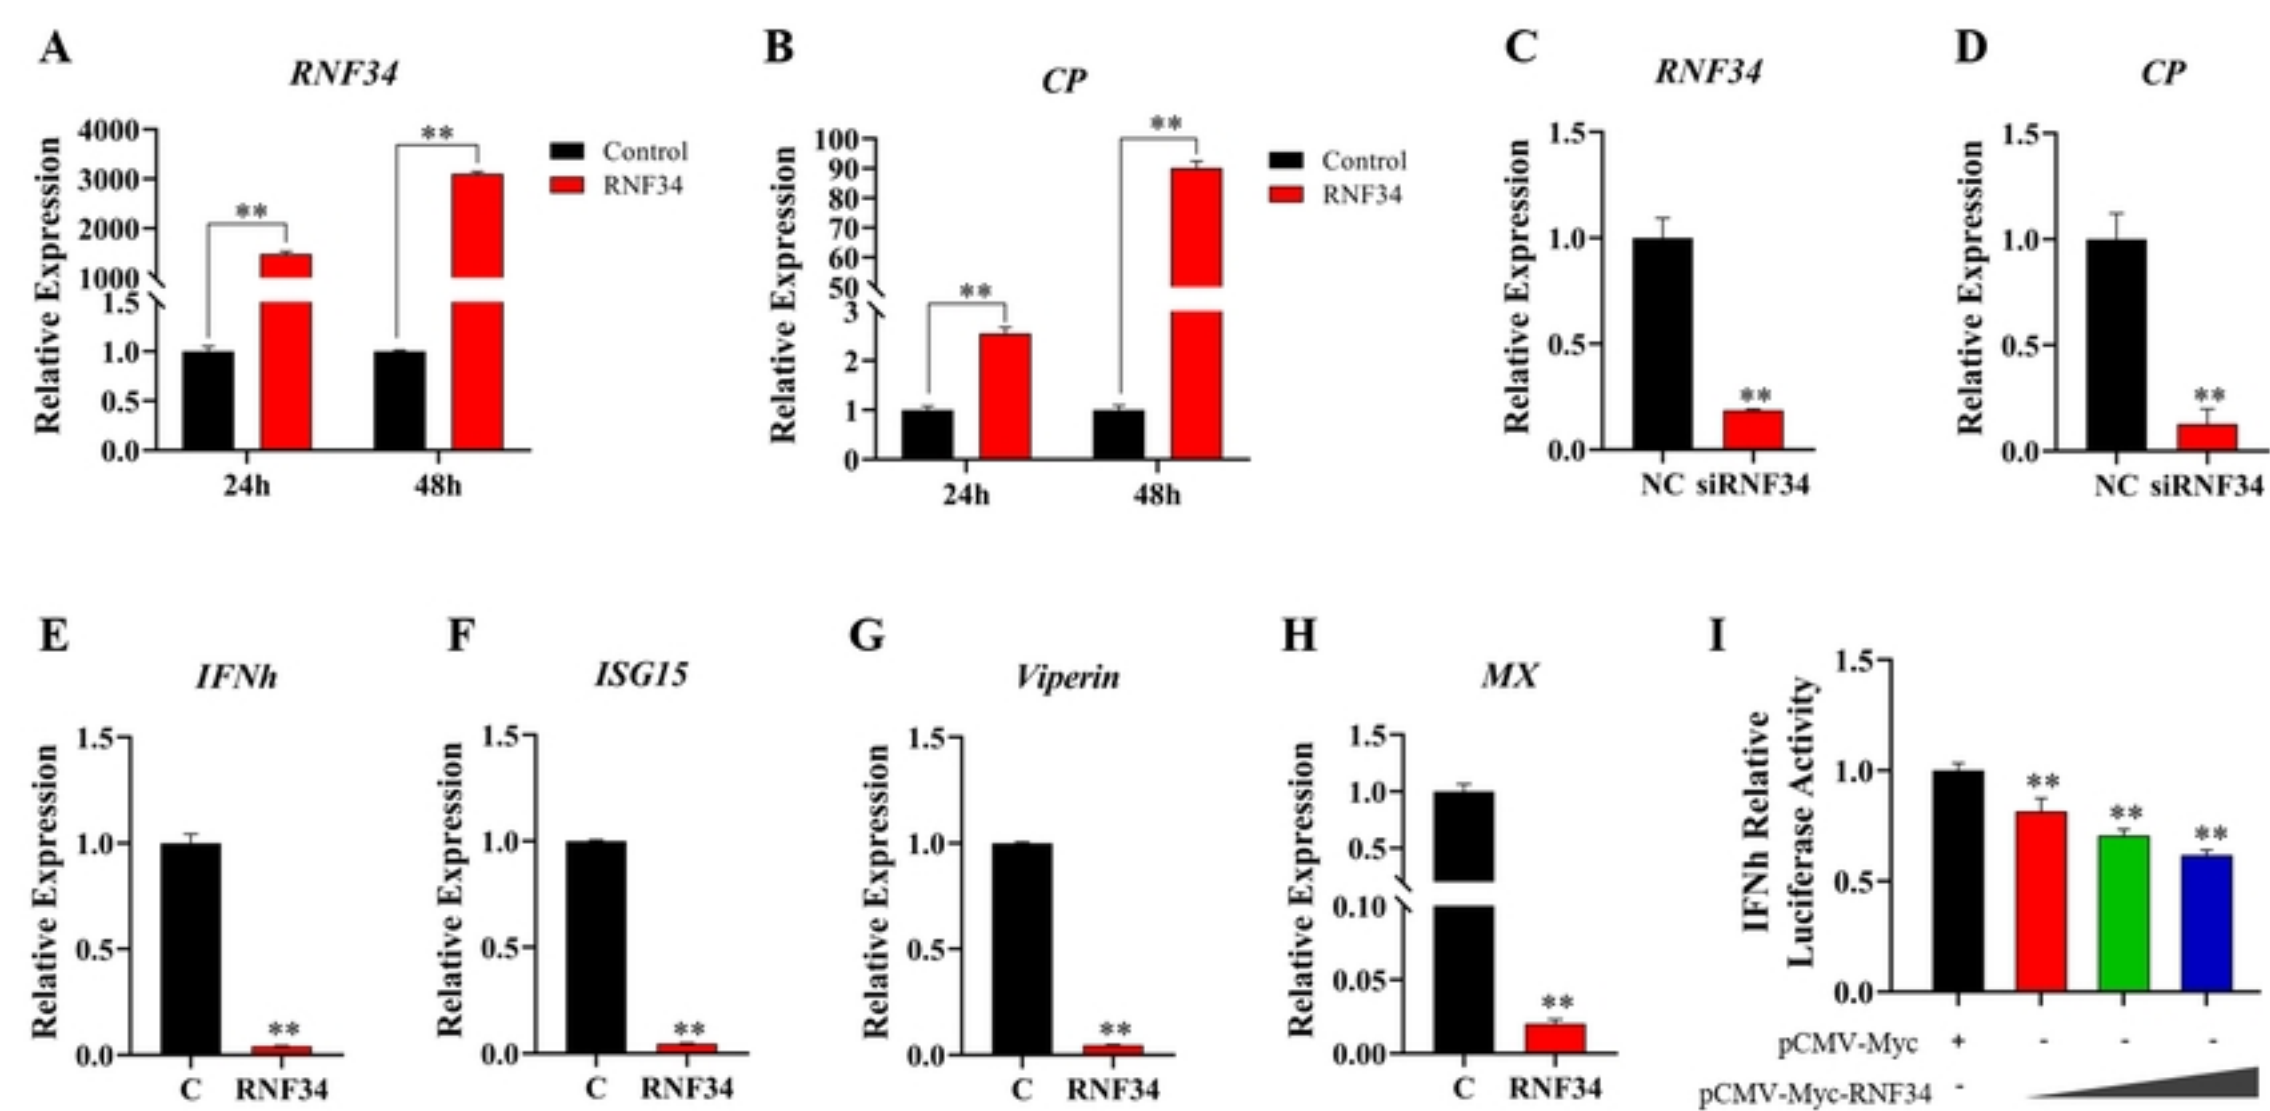

Figure 1
